1 **Ontology-Aware Deep Learning Enables Novel Antibiotic Resistance**

2 **Gene Discovery Towards Comprehensive Profiling of ARGs**

3

4 Yuguo Zha<sup>1</sup>, Cheng Chen<sup>2</sup>, Qihong Jiao<sup>2</sup>, Xiaomei Zeng<sup>1,\*</sup>, Xuefeng Cui<sup>2,\*</sup>, Kang  
5 Ning<sup>1,\*</sup>

6 <sup>1</sup>Key Laboratory of Molecular Biophysics of the Ministry of Education, Hubei Key  
7 Laboratory of Bioinformatics and Molecular-imaging, Center of AI Biology,  
8 Department of Bioinformatics and Systems Biology, College of Life Science and  
9 Technology, Huazhong University of Science and Technology, Wuhan 430074, Hubei,  
10 China

11 <sup>2</sup>School of Computer Science and Technology, Shandong University, Qingdao 266237,  
12 Shandong, China

13 \*Correspondence should be addressed to K.N (Email: ningkang@hust.edu.cn), X.C  
14 (Email: xfcui@email.sdu.edu.cn) and X.Z (Email: xmzeng@hust.edu.cn)

15

16 **Abstract**

17 Antibiotic resistance genes (ARGs) have emerged in pathogens and spread faster than  
18 expected, arousing a worldwide concern. Current methods are suitable mainly for the  
19 discovery of close homologous ARGs and have limited utility for discovery of novel  
20 ARGs, thus rendering the profiling of ARGs incomprehensive. Here, an  
21 ontology-aware deep learning model, ONN4ARG (<http://onn4arg.xfcui.com/>), is  
22 proposed for the discovery of novel ARGs based on multi-level annotations.  
23 Experiments based on billions of candidate microbial genes collected from various  
24 environments show the superiority of ONN4ARG in comprehensive ARG profiling.  
25 Enrichment analyses show that ARGs are both environment-specific and host-specific.  
26 For example, resistance genes for rifamycin, which is an important antibacterial agent

27 active against gram-positive bacteria, are enriched in Actinobacteria and in soil  
28 environment. Case studies verified ONN4ARG's ability for novel ARG discovery.  
29 For example, a novel streptomycin resistance gene was discovered from oral  
30 microbiome samples and validated through wet-lab experiments. ONN4ARG  
31 provides a complete picture of the prevalence of ARGs in microbial communities as  
32 well as guidance for detection and reduction of the spread of resistance genes.

33 **Keywords:** antibiotic resistance gene, ontology-aware, deep learning, novel ARG,  
34 microbiome

35

## 36 **Introduction**

37 With the development of metagenomics and next-generation sequencing, many new  
38 microbial taxa and genes have been discovered, but different kinds of “unknowns”  
39 remain. For instance, the microbes found in the human gut microbiome involve 25  
40 phyla, more than 2,000 genera, and 5,000 species<sup>1</sup>. However, the functional diversity  
41 of microbiomes has not been fully explored, and about 40% of microbial gene  
42 functions remain to be discovered<sup>2</sup>. A typical example is the antibiotic resistance gene  
43 (ARG), which is an urgent and growing threat to public health<sup>3</sup>. In the past few  
44 decades, problems caused by antibiotic resistance have drawn the public's attention<sup>4</sup>.  
45 Antibiotic resistance in pathogens has been an increasing threat to human health over  
46 the past decade, and it is widely accepted that antibiotic resistance development and  
47 spread in microbes can be largely attributed to the abuse and misuse of antibiotics. A  
48 direct correlation between antimicrobial use and the extent of antimicrobial resistance  
49 has been reported<sup>4</sup>. Antimicrobial resistance genomic data is an ever-expanding data  
50 source, with many new ARG families discovered in recent years<sup>5,6</sup>. The discovery of  
51 resistance genes in diverse environments offers possibilities for early surveillance,  
52 actions to reduce transmission, gene-based diagnostics, and, ultimately, improved  
53 treatment<sup>7</sup>.

54

55 Existing annotated ARGs have been curated manually or automatically for decades.

56 Presently, there are 2,979 annotated ARGs in the reference database CARD<sup>5,6</sup> (v3.1.2,  
57 released in April 2021), 3,159 in the ResFinder database<sup>8</sup> (as of May 2021), and 2,675  
58 in SwissProt<sup>9</sup> (as of May 2021). These annotated ARGs are categorized into antibiotic  
59 resistance types, which are organized in an ontology structure (see **Methods**,  
60 **Supplementary Figure 1**), in which higher-level ARG types cover lower-level ARG  
61 types. For example, AHE40557.1 is annotated in the CARD database as a  
62 streptomycin resistance gene, which belongs to a lower-level ARG type  
63 aminoglycoside and a higher-level ARG type non-beta-lactam. Current ARG  
64 databases are far from complete: though no ARG database contains more than 4,000  
65 well-annotated ARGs, NCBI non-redundant database searches yielded more than  
66 7,000 putative genes annotated with “antibiotic resistance” as of May 2021. Therefore,  
67 we deemed that there is a large gap between the genes annotated in ARG databases  
68 and the possible ARGs that already exist in general databases, not to mention ARGs  
69 that are not yet annotated.

70

71 Many ARG prediction tools have been proposed in the past few years<sup>8,10-20</sup>. These  
72 tools can generally be divided into two approaches. One approach is  
73 sequence-alignment, such as BLAST<sup>21</sup>, USEARCH<sup>22</sup>, and Diamond<sup>23</sup>, which uses  
74 homologous genes to annotate unclassified genes. A confident prediction requires a  
75 homolog with sequence identity greater than 80% in many programs, such as  
76 ResFinder<sup>8,11</sup>. The other approach is deep learning, such as DeepARG<sup>12</sup> and  
77 HMD-ARG<sup>16</sup>, which uses neural network models to predict and annotate ARGs. The  
78 input of deep learning approach can be bit-score (for DeepARG) or one-hot encoding  
79 vector of protein sequence (for HMD-ARG).

80

81 Several limitations still preclude comprehensive profiling of antibiotic resistance  
82 genes. A more comprehensive set of ARGs could be roughly defined as having more  
83 ARGs in type and number with less false-positive entries, regardless of the homology  
84 with known ARGs, and many of these ARGs could be experimentally validated.  
85 Based on this definition, existing tools fall short in comprehensive profiling of ARGs.

86 First, existing tools are limited to a few types of ARGs due to the fact that the datasets  
87 used for building models are specialized and therefore cannot reconstruct the  
88 comprehensive profile of ARGs across various environments. For example,  
89 HMD-ARG<sup>16</sup> identifies only 15 types of resistance genes, and PATRIC<sup>13</sup> is limited to  
90 identifying ARGs encoding resistance to carbapenem, methicillin, and beta-lactam  
91 antibiotics. Second, existing tools fall short in discovering novel ARGs, which usually  
92 lack homology to known sequences in the reference databases. For instance, the gene  
93 POCOZ1 (VraR) that confers resistance to vancomycin has a sequence identity of  
94 only 24% to the homolog from the CARD<sup>12</sup>. Recognizing such remote homologs  
95 requires the ability to perceive the correlation between the internal features of genes,  
96 which is challenging for existing tools. Therefore, there is an urgent need for a new  
97 approach to address these limitations.

98

99 Here, we propose an ontology-aware deep learning approach, ONN4ARG, which  
100 allows comprehensive identification of ARGs. ONN4ARG is an ontology-aware  
101 neural network model that employs a novel ontology-aware layer and generates  
102 multi-level annotations of antibiotic resistance types (**Figure 1**). Systematic  
103 evaluations show that the ONN4ARG model has a profound performance  
104 improvement over state-of-the-art models such as DeepARG, especially for the  
105 detection of remotely homologous ARGs. The application of ONN4ARG has  
106 uncovered a total of 120,726 ARGs from the microbiome, which has greatly expanded  
107 the existing ARG repositories. Enrichment analyses have confirmed the enrichment  
108 patterns of ARG types across multiple environments, showing that ARGs are both  
109 environment-specific and host-specific. For example, resistance genes for rifamycin,  
110 which is an important antibacterial agent active against gram-positive bacteria, are  
111 enriched in Actinobacteria and in soil environment. Case studies have also verified  
112 the ability of ONN4ARG for novel ARG discovery. For example, a recently  
113 experimentally validated ARG gene GAR<sup>7</sup>, which is not in the CARD database, could  
114 not be identified by DeepARG or HMD-ARG but was predicted by ONN4ARG. A  
115 novel streptomycin resistance gene was also discovered by ONN4ARG from oral

116 microbiome data and validated through wet-lab experiments.

117

118 In summary, ONN4ARG is a comprehensive deep learning method for ARG  
119 discovery, which provides a complete picture of the prevalence of ARGs in microbial  
120 communities as well as guidance for detection and reduction of the spread of  
121 resistance genes.

122

## 123 **Results**

### 124 **ONN4ARG model employs an ontology-aware neural network for ARG** 125 **identification and classification**

126 To address the large gap between the genes annotated in ARG databases and the  
127 possible ARGs that already exist in general databases along with the ARGs that are  
128 not yet annotated, we propose ONN4ARG, which is an ontology-aware neural  
129 network model (**Figure 1a**), that could be used to predict ARGs in a comprehensive  
130 manner. ONN4ARG takes similarities (e.g., identity, e-value, bit-score) between the  
131 query gene sequence and ARG gene sequences and profiles (i.e., PSSM) as inputs and  
132 predicts ARG annotations for the query gene. These sequence-alignment similarities  
133 and profile-alignment similarities are pre-processed by calling Diamond<sup>23</sup> and  
134 HHsearch<sup>24</sup>. ONN4ARG generates multi-level annotations of antibiotic resistance  
135 types, which are compatible with the antibiotic resistance ontology structure. One  
136 advantage of ONN4ARG over state-of-the-art models is that ONN4ARG employs a  
137 novel ontology-aware layer that incorporates ancestor and descendent annotations to  
138 enhance annotation accuracies. ONN4ARG outperforms existing models, including  
139 DeepARG, with higher average accuracies and better generalization ability for unseen  
140 data. To train and evaluate our ONN4ARG model and for rapid deployment of ARG  
141 discovery in multiple contexts, we also built an ARG database (**Figure 1b**), namely,  
142 ONN4ARG-DB, which comprises ARGs from CARD and UniProt (see **Methods**).

143

### 144 **Systematic evaluation and comparison**

145 ONN4ARG has high efficiency, high accuracy, and comprehensiveness for ARG  
146 identification based on our systematic evaluation of ONN4ARG and comparison with  
147 other models. The evaluation and comparison were based on ONN4ARG-DB, with  
148 28,396 positive ARGs and 17,937 negatives, out of which 75% of the dataset was  
149 randomly selected for training and the remaining 25% of the dataset was selected for  
150 testing (see **Methods**).

151

152 We evaluated ONN4ARG's efficiency, accuracy, and comprehensiveness. As an  
153 ontology-aware deep learning model, ONN4ARG is fast: it could complete ARG  
154 identification for all genes in the testing dataset within four hours, which is equivalent  
155 to one second per gene identification. As shown in **Figure 2a**, ONN4ARG was more  
156 accurate for ARG identification (overall accuracy of 97.70%) compared to sequence  
157 alignment (overall accuracy of 69.11%) and DeepARG (overall accuracy of 96.39%).  
158 Moreover, ONN4ARG achieved an overall precision of 75.59% and an overall recall  
159 of 89.93%, which were higher than DeepARG's overall precision of 68.30% and  
160 overall recall of 77.84% (**Figure 2b**). It is natural that ONN4ARG could not  
161 outperform DeepARG in all resistance types and this is exemplified by results on  
162 pleuromutilin due to the small number of sequences for pleuromutilin in the  
163 ONN4ARG-DB. In addition, for most of the resistance types that have adequate  
164 number of sequences, ONN4ARG's results could achieve higher precision and recall.  
165 Thus, with the accumulation of annotated ARG sequences, greater advantages of both  
166 ONN4ARG-DB and ONN4ARG could be expected. Furthermore, ONN4ARG was  
167 more comprehensive for ARG identification: there were 4,916 ARGs in the testing set  
168 (with the masking threshold of testing equal to 0.4, see **Methods**), out of which 4,913  
169 were identified by the ONN4ARG model, whereas DeepARG identified 4,906  
170 (**Supplementary Table 1**).

171

172 ONN4ARG demonstrates an advantage over other methods in identification of  
173 remotely homologous ARGs whose sequences are not similar to existing ARG  
174 sequences (**Supplementary Tables 2 and 3**). In this context, when testing with only

175 remote homologs (i.e., the masking threshold of testing set equal to 0.4), ONN4ARG  
176 achieves an accuracy of 94.26%, which is significantly improved from 89.85% of  
177 DeepARG. When testing with all close and remote homologs (i.e., the masking  
178 threshold of testing set equal to 1.0), both ONN4ARG and DeepARG achieved high  
179 accuracies. These results validate ONN4ARG's significantly better generalization  
180 abilities than sequence-alignment and DeepARG, which makes ONN4ARG especially  
181 suitable for identification of remotely homologous ARGs and indicates ONN4ARG's  
182 ability for novel ARG discovery (**Supplementary Tables 1–3**).

183

184 In summary, ONN4ARG has high efficiency, accuracy, and comprehensiveness for  
185 ARG identification, and it possesses the ability for identification of remotely  
186 homologous ARGs.

187

#### 188 **Applications of ONN4ARG on metagenomic data**

189 We collected metagenomic samples from several published studies<sup>25,26</sup>. These samples  
190 were mainly from “marine,” “soil,” and “human” environments. Human-associated  
191 samples consisted of two gut groups (one group from Madagascar, i.e., GutM; the  
192 other group from Denmark, i.e., GutD), one oral group, and one skin group (both oral  
193 and skin groups were from the HMP project). Details about these samples are  
194 provided in **Supplementary Table 4**. Then, genes were obtained by calling Prodigal<sup>27</sup>.  
195 The ONN4ARG model was used to predict whether these unclassified genes were  
196 ARGs and their corresponding resistance types. In total, 120,726 ARGs were  
197 identified from microbiome samples, many of which are novel, which greatly expands  
198 the existing ARG repositories.

199

#### 200 **Broad-spectrum profile of predicted ARGs among diverse environments**

201 We first investigated the proportion of predicted ARGs for different sequence lengths.  
202 The distribution shows that about half of the predicted ARGs have a length of  
203 128–256 amino acid residues (**Figure 3a**). We found that human-associated  
204 microbiome samples carry a higher abundance of ARGs, especially for the oral group,

205 in which more than one resistance gene could be observed out of a hundred genes on  
206 average (**Figure 3b, Supplementary Table 5**).

207

208 For ARGs detected in samples from all environments, we found that about a third of  
209 them (42,848 out of all 120,726 ARGs) had sequence identity of less than 40% to  
210 their homologs in the ONN4ARG-DB (**Figure 3c**). We define these ARGs as novel  
211 ARGs, which have low sequence identities when aligned to their homologs in the  
212 reference database (i.e., ONN4ARG-DB). For example, we found 45% of predicted  
213 ARGs in the marine group belonged to novel ARGs (**Figure 3c**).

214

215 In total, 31 ARG types were detected in these various environments (**Figure 3d**,  
216 **Supplementary Figure 2**). The number of predicted ARG sequences for different  
217 types varied greatly (**Figure 3d**), from a few (i.e., nitrofurans) to thousands (i.e.,  
218 fluoroquinolones). In general, fluoroquinolone and tetracycline resistance genes were  
219 more abundant than other types (**Figure 3d**). As expected, these abundant ARGs were  
220 usually associated with the antibiotics used extensively in human medicine or  
221 veterinary medicine, including growth promotion<sup>28</sup>. Novel ARG detection indicates  
222 the unique ability of ONN4ARG in novel ARG discovery and ARG abundance  
223 profiling in various environments, which would help researchers to better understand  
224 the prevalence of antibiotic resistance genes.

225

### 226 **Enrichment of predicted ARGs among diverse hosts and environments**

227 Rapid deciphering of potential antimicrobial-resistant pathogens is necessary for  
228 effective public health monitoring. The host-tracking of ARGs allows for accurate  
229 identification of pathogens. Therefore, we conducted Kraken2<sup>29</sup> analysis to track the  
230 hosts of these predicted ARGs. Results showed that there are 949 genera, each genus  
231 carries at least one type of ARG (**Supplementary Table 6**). The host composition and  
232 distribution of all classified ARGs for the most abundant 20 genera are displayed in  
233 **Supplementary Figure 3**. The host distribution shows that these predicted ARGs are  
234 primarily affiliated with Proteobacteria (38.2%), including *Candidatus Pelagibacter*,



235 *Pseudomonas*, *Bradyrhizobium*, and *Escherichia* (**Supplementary Figure 3**). The  
236 most abundant ARGs carried by the 20 genera were resistance types of  
237 fluoroquinolone, macrolide, peptide, penam, and tetracycline, accounting for about  
238 half of the total detected ARGs (**Supplementary Figure 3**). We used network  
239 inference based on strong (Pearson's correlation  $\rho > 0.8$ ) and significant (P-value  $<$   
240 0.01) correlations to investigate the co-occurrence patterns among ARG types and  
241 microbial taxa (**Supplementary Figure 4, Supplementary Note**). The co-occurrence  
242 network indicated the co-occurrence patterns between ARGs and microbial taxa. For  
243 example, ARGs that belong to beta-lactam resistance type (e.g., cephamycin, penam,  
244 penem, and monobactam) were observed to appear together in Proteobacteria.

245

246 Enrichment analyses showed that ARGs are both environment-specific and  
247 host-specific (**Figure 4**). We found that the proportion of certain types of ARGs was  
248 significantly higher in certain environments than in others. For example, rifamycin  
249 resistance genes were found enriched in Actinobacteria (with proportion of 0.1%) and  
250 enriched in the soil environment (with proportion of 4.7%) (**Figure 4**). Rifamycin is  
251 an important antibacterial agent active against gram-positive bacteria, and it has a  
252 wide range of applications<sup>30,31</sup>. The enrichment results were not surprising because  
253 *Actinomyces* is a representative genus widely distributed in various soil  
254 environments, and its rifamycin resistance is compatible with its ability for rifamycin  
255 production<sup>32-35</sup>.

256

### 257 **Evaluation of the ability for novel ARG identification using a recently annotated** 258 **ARG**

259 We further evaluated ONN4ARG's ability for novel ARG identification based on the  
260 assessment of a newly annotated aminoglycoside resistance gene, GAR<sup>7</sup>. GAR is a  
261 recently reported aminoglycoside resistance gene (e.g., gentamicin, micromycin)  
262 that belongs to non-beta-lactam, which is not present in CARD (v3.0.3), UniProt (as  
263 of May 2021), DEEPARG-DB (v1.0.2), HMD-ARG-DB (as of May 2021), and  
264 ONN4ARG-DB. We searched the sequence of GAR with both DeepARG and

265 HMD-ARG models, and the results showed that both of these models indicated it as  
266 non-ARG. We searched the sequence of GAR against all the sequences in  
267 ONN4ARG-DB using Diamond and did not find any homologous gene as well.  
268 However, the prediction by ONN4ARG identified GAR as an ARG resistant to  
269 non-beta-lactam with high confidence (probability score = 100%). We should  
270 emphasize that though ONN4ARG could only predict GAR as non-beta-lactam and  
271 not as sub-type of aminoglycoside, it was the only method used in this study that  
272 could predict GAR as an ARG gene, which again confirms ONN4ARG's better  
273 generalization ability for novel ARG discovery.

274

#### 275 **Functional verification of candidate novel resistance genes**

276 To identify promising putative novel resistance genes, we used four criteria: (i)  
277 remote homologs to reference ARGs, (ii) prediction with high confidence, (iii)  
278 predicted to be single-type resistance, and (iv) the host is known. Despite the large  
279 number of candidate genes discovered by the ONN4ARG model (**Supplementary**  
280 **Table 5**), only 4,365 ARGs fulfilled all mentioned criteria (**Supplementary Table 7**).

281

282 We selected one candidate ARG (Candi\_60363\_1) for further experimental validation  
283 (**Supplementary Tables 8 and 9**). Candi\_60363\_1, detected in *Streptococcus* in the  
284 oral environment, was predicted to be streptomycin (belonging to aminoglycoside)  
285 resistant with high confidence by the ONN4ARG model, and the closest homolog of  
286 Candi\_60363\_1 in ONN4ARG-DB is P12055 (sequence identity of 37.2%). One  
287 positive control from CARD (AHE40557.1, streptomycin resistance gene) was used  
288 in our experiments for verification of the experimental system. All these genes were  
289 heterologously expressed in the *E. coli* BL21 (DE3) host by the induction of Isopropyl  
290  $\beta$ -D-1-thiogalactopyranoside (IPTG) and tested for minimal inhibitory concentration  
291 (MIC) (**Figure 5a**). The result showed that the mRNA level of the genes increased  
292 with the addition of 1 mM IPTG compared with that without IPTG (**Figure 5b**),  
293 which verified the expression of the genes induced by IPTG. Furthermore, the MIC of  
294 the strain containing the positive control gene AHE40557.1 was more than 1,024

295  $\mu\text{g/ml}$  (**Supplementary Figure 5**), which is consistent with previous reports<sup>36,37</sup>. This  
296 verified that our MIC measuring experimental system works well. Our results showed  
297 that the MIC of the strain containing Candi\_60363\_1 was significantly higher than the  
298 negative control containing no insert (**Figure 5c, Supplementary Figure 5**), which  
299 demonstrated the increased resistance to streptomycin of the novel candidate gene  
300 Candi\_60363\_1 and verified the good performance of our model.

301

### 302 **Phylogeny and structure of Candi\_60363\_1**

303 There are remote similarities between Candi\_60363\_1 and all known ARGs in the  
304 reference database, including aminoglycoside resistance genes (closest homolog is  
305 P12055, sequence identity of 37.2%). The function annotation of P12055 shows that it  
306 has the catalytic activity of reaction between streptomycin and ATP, and it is required  
307 for streptomycin resistance (<https://www.uniprot.org/citations/3357770>). Additionally,  
308 the search result of Candi\_60363\_1 using InterPro (the Integrated Resource of Protein  
309 Domains and Functional Sites) shows the protein family matching to Candi\_60363\_1  
310 is IPR007530, which is also known as aminoglycoside 6-adenylyltransferase that  
311 confers resistance to aminoglycoside antibiotics. Then, we used BLAST to search  
312 homologs of Candi\_60363\_1 from the NCBI non-redundant protein database. The  
313 BLAST result showed that there are 44 homologs with sequence identity greater than  
314 80%, and they are from various organisms (**Supplementary Table 10**), such as  
315 *Streptococcus oralis*, *Peptoniphilus lacrimalis* DNF00528, and *Mycobacteroides*  
316 *abscessus* subsp. *Abscessus*. Considering that Candi\_60363\_1 is harbored by distantly  
317 related species, it obviously has mobility. Notably, the most similar protein of  
318 Candi\_60363\_1 from the NCBI non-redundant protein database (87.5% identity,  
319 SHZ78752.1) is also annotated as aminoglycoside adenylyltransferase  
320 (**Supplementary Table 10**). The result of BLAST search against the NCBI  
321 non-redundant protein database and other databases showed that Candi\_60363\_1,  
322 which is absent in all the existing ARG databases, is highly likely to be an ARG that  
323 confers resistance to aminoglycoside antibiotics.

324

325 Aminoglycoside modifying enzymes are the most clinically important resistance  
326 mechanism against aminoglycosides<sup>38</sup>. Aminoglycoside modifying enzymes are  
327 divided into three enzymatic classes, namely, aminoglycoside N-acetyltransferase  
328 (AAC), O-nucleotidyltransferase (ANT), and O-phosphotransferase (APH). We  
329 investigated the phylogenetic relationship between Candi\_60363\_1 and the known  
330 aminoglycoside modifying enzymes. The phylogenetic tree of Candi\_60363\_1 and  
331 related proteins (**Figure 6a**) shows that Candi\_60363\_1 is clearly separated from the  
332 known aminoglycoside modifying enzymes and is located among proteins mostly  
333 annotated as aminoglycoside adenylyltransferase. Phylogenetic analysis indicated its  
334 evolutionarily close relationships with known aminoglycoside adenylyltransferase.

335

336 Protein structure prediction results confirmed the anti-microbial functionality of  
337 Candi\_60363\_1. The optimal Candi\_60363\_1-streptomycin complex structure and the  
338 corresponding interaction details are described in **Figure 6b**. The optimal binding  
339 affinity between the Candi\_60363\_1 and streptomycin is  $-7.7$  kcal/mol  
340 (**Supplementary Table 11**), which is  $1.6$  kcal/mol lower than the negative control. As  
341 shown in **Figure 6b**, the Streptomycin ligand can fit the ARG protein structure well  
342 and generate a geometric and energetic docking complex.

343

344 From wet-lab experiments, phylogenetic analysis, and protein structure docking, we  
345 consider that Candi\_60363\_1 predicted by ONN4ARG is highly likely a real ARG  
346 gene.

347

## 348 **Discussion**

349 In this study, we proposed an ontology-aware deep learning method, ONN4ARG, for  
350 the detection and understanding of antibiotic resistance genes. The ONN4ARG model  
351 is capable of accurately identifying ARGs from coarse to fine levels and discovering  
352 novel ARGs that lack homology to known sequences in the reference databases. To  
353 complement ONN4ARG for ARG mining applications, we have also created a custom

354 ARG database, ONN4ARG-DB, that contains 28,396 well-curated ARGs. The  
355 application of ONN4ARG uncovered 120,726 ARGs from microbiome samples, out  
356 of which 42,848 are novel, which substantially expands the existing ARGs  
357 repositories.

358

359 The novelty of this work is in three contexts. First, ONN4ARG has the potential for  
360 detection of remotely homologous ARGs and thus generates a more comprehensive  
361 set of ARGs. The advantage of our ONN4ARG model over state-of-the-art models is  
362 that ONN4ARG employs a novel ontology-aware layer that incorporates ancestor and  
363 descendant annotations to enhance annotation accuracies. The comprehensive  
364 antibiotic resistance ontology used in the ONN4ARG model consists of four levels  
365 and more than 100 resistance types (**Supplementary Table 12**), which includes  
366 hierarchical antibiotic resistance annotations from the most popular ARG database,  
367 CARD. Thus, the classification range of the ONN4ARG model is substantially larger  
368 than current tools (e.g., 30 types supported for DeepARG and 15 types supported for  
369 HMD-ARG). The ability of ONN4ARG to identify remote homologs (i.e., sequence  
370 identity between 30% and 40%) allows more accurate prediction for those  
371 misclassified by sequence-alignment based tools as false negatives. Therefore,  
372 ONN4ARG greatly reduces false negatives and offers a powerful approach for  
373 comprehensive and accurate profiling of ARGs.

374

375 Second, it enabled the comprehensive enrichment analysis of ARGs, species-wise and  
376 environment-wise. For the actual application of the ONN4ARG model, we  
377 investigated the presence of ARGs in a variety of environments, including water, soil,  
378 and the human gut, and the results showed that ARGs are environment-specific and  
379 host-specific (**Figure 4**). The environment-specific and host-specific phenomenon of  
380 ARGs may be caused by specific bacteria evolving to possess specific types of ARGs  
381 in response to specific environments, and horizontal gene transfer may be one of the  
382 mediating pathways of this process. For example, one published study has reported  
383 that *Amycolatopsis* in the soil environment produces rifamycin and thus gains

384 ecological advantages over other bacteria<sup>32</sup>.

385

386 Third, the novel ARGs predicted by ONN4ARG could be functionally validated.  
387 Functional verification of a novel streptomycin resistance gene (i.e., Candi\_60363\_1)  
388 with wet-lab experiments demonstrated the ability of the ONN4ARG model for novel  
389 ARG discovery. Although the MIC test value of Candi\_60363\_1 was only two times  
390 higher than that of the control (**Figure 5**), this increase was still sufficient to indicate  
391 the presence of resistance. Moreover, phylogenetic analysis and protein structure  
392 docking further confirmed that Candi\_60363\_1 is highly likely to be an ARG that  
393 confers resistance to aminoglycoside antibiotics. Another validation of novel ARG  
394 identification based on the assessment of a recently annotated ARG (i.e., GAR) also  
395 indicated the ability of the ONN4ARG model for novel ARG discovery. GAR is a  
396 novel ARG that is resistant to a variety of aminoglycosides (e.g., gentamicin and  
397 micromonicin). We searched the sequence of GAR using other tools (i.e., DeepARG  
398 and HMD-ARG), and the results showed that both of those models indicated it as  
399 non-ARG. We emphasize that the ONN4ARG model only identified GAR as  
400 non-beta-lactam. This shows that the multi-level annotations of ONN4ARG allow low  
401 resolution recognition, which can greatly decrease the false negative rate.

402

403 In summary, ONN4ARG is a deep learning approach for ARG identification. It allows  
404 in-depth gene mining on large-scale metagenomic data and helps researchers discover  
405 novel ARGs. ONN4ARG provides a complete picture of the prevalence of ARGs in  
406 the microbial communities and guidance for detection and reduction of the spread of  
407 resistance genes in such scenarios, including clinical research, environmental  
408 monitoring, and agricultural management.

409

410 ONN4ARG could be improved in a few ways. For more comprehensive ARG  
411 prediction, continuous improvement of curating ARG nomenclature and annotation  
412 databases is required. For novel ARG prediction, especially those belonging to  
413 entirely new ARG families, deep learning models might need to consider more

414 information other than sequence alone. We believe these efforts could lead to a  
415 holistic view about ARGs in diverse environments around the globe.

416

## 417 **Methods**

### 418 **Dataset**

419 The ARGs we used in this study for model training and testing were from the  
420 Comprehensive Antibiotic Resistance Database (CARD<sup>5,6</sup>, v3.0.3). We also used  
421 protein sequences from the UniProt (SwissProt and TrEMBL) database to expand our  
422 training dataset. First, genes with ARG annotations were collected from CARD (2,587  
423 ARGs) and SwissProt (2,261 ARGs). Then, their close homologs (with sequence  
424 identities greater than 90%) were collected from TrEMBL (23,728 homologous genes).  
425 These annotated and homologous ARGs made up our positive dataset. The negative  
426 dataset was made from non-ARG genes that had relatively weak sequence similarities  
427 to ARG genes (with sequence identities smaller than 90% and bit-scores smaller than  
428 alignment lengths) but not annotated as ARG genes in SwissProt (17,937 genes).  
429 Finally, redundant genes with identical sequences were filtered out. As a result, our  
430 ARG gene dataset, namely, ONN4ARG-DB, contained 28,396 positive and 17,937  
431 negative genes. For evaluation and comparison of ONN4ARG, 75% of the dataset  
432 was randomly selected for training, and the remaining 25% of the dataset was selected  
433 for testing.

434

### 435 **Antibiotic resistance ontology**

436 The antibiotic resistance ontology was organized into an ontology structure, which  
437 contains four levels. The root (first level) is a single node, namely, “arg”  
438 (**Supplementary Table 12**). There are 1, 2, 34, and 277 nodes from the first level to  
439 the fourth level, respectively. For instance, there are “beta-lactam” and  
440 “non-beta-lactam” in the second level, “acridine dye” and “aminocoumarin” in the  
441 third level, and “acriflavine” and “clorobiocin” in the fourth level. For example,  
442 AHE40557.1 is annotated in the CARD database as a streptomycin resistance gene,



443 which belongs to a lower-level ARG type aminoglycoside and a higher-level ARG  
444 type non-beta-lactam (**Supplementary Figure 1**).

445

#### 446 **Protein annotations**

447 The protein sequences for training and testing were annotated according to the  
448 antibiotic resistance ontology. For example, AHE40557.1 is annotated in the CARD  
449 database as a streptomycin resistance gene, which belongs to a lower-level ARG type  
450 aminoglycoside and a higher-level ARG type non-beta-lactam. Accordingly, this  
451 protein will be annotated as “arg” at the first level, “non-beta-lactam” at the second  
452 level, “aminoglycoside” at the third level, and “streptomycin” at the fourth level.

453

#### 454 **Sequence-alignment**

455 We used Diamond<sup>23</sup> as the sequence-alignment tool for comparison. For queries in the  
456 testing set, we searched them against the training set. The target with the highest  
457 identity was defined as the closest homologous gene for each query. Then, we  
458 compared whether the actual annotation of the query was consistent with the  
459 annotation of its closest homologous gene to evaluate the accuracy.

460

#### 461 **DeepARG**

462 DeepARG<sup>12</sup> is a newly developed tool that applies a neural network to identify  
463 antibiotic resistance genes. For queries in the testing set, we used the DeepARG<sup>12</sup>  
464 model to predict their annotations. Then, we compared whether the actual annotation  
465 of the query was consistent with the predicted annotation to evaluate the accuracy.

466

#### 467 **Evaluation and comparison**

468 In this study, the performance of ONN4ARG was evaluated and compared to  
469 state-of-the-art models, including sequence-alignment and DeepARG. For these three  
470 models, the training dataset was used to train the model parameters, and the testing  
471 dataset was used to calculate the prediction accuracies. Both DeepARG and  
472 ONN4ARG are deep learning models that use millions of parameters. Unlike deep



473 learning models, sequence-alignment (i.e., Diamond) has only one parameter (i.e., the  
474 identity cutoff to distinguish ARG and non-ARG genes).

475

#### 476 **Masking threshold**

477 To simulate remotely homologous ARG genes in our experiments, similarities  
478 between the query protein and its close homologs with sequence identities greater  
479 than a threshold were masked as zeros (i.e., no signals). For instance, when the  
480 masking threshold of testing set equaled 0.4, similarities between the query protein (in  
481 the testing set) and its close homologs (in the training set) with sequence identities  
482 greater than 40% were masked as zeros. Occasionally, all homologs were masked for  
483 a query protein, and such query proteins were removed during training and testing.  
484 For example, if query  $X$  had two homologs,  $M$  and  $N$ , and assuming the identity of  $M$   
485 is 0.35 and the identity of  $N$  is 0.85, when the masking threshold of the testing set  
486 equaled 0.4, similarities between query  $X$  and homolog  $M$  were masked as zeros.  
487 When the masking threshold of the testing set equaled 0.9, query  $X$  was removed  
488 during testing.

489

#### 490 **Benchmark method**

491 In this study, a prediction was defined to be correct if and only if all ARG annotations  
492 (including ancestor annotations from ARG ontologies) were correctly predicted. The  
493 accuracy of the tested model was defined as the number of correct predictions over  
494 the total number of predictions. The precision of the tested model was defined as the  
495 number of true positive predictions over the total number of positive predictions, and  
496 the recall was defined as the number of true positive predictions over the total number  
497 of true positive plus false negative predictions.

498

#### 499 **ARG mining on metagenomic data**

500 We collected microbiome sequencing data from several published studies  
501 (**Supplementary Table 4**), including samples from soil, water, and human body. The  
502 gene contigs were processed by Prodigal<sup>27</sup>. Protein sequences were also obtained by

503 the Prodigal program. Then, the ARG annotations of these protein sequences were  
504 predicted by using ONN4ARG.

505

#### 506 **Taxonomy annotation**

507 Kraken2<sup>29</sup> program was used to identify the host of gene contigs. Then, each ARG  
508 predicted by ONN4ARG was annotated according to the host of its gene contigs.

509

#### 510 **Phylogenetic tree**

511 Sequences of the 44 proteins most closely related to Candi\_60363\_1 were collected  
512 using BLASTP with default parameters on the NCBI non-redundant protein database.  
513 The retrieved proteins, Candi\_60363\_1 and all aminoglycoside resistance proteins  
514 from ResFinder<sup>8</sup> ([https://bitbucket.org/genomicepidemiology/resfinder\\_db/src/master](https://bitbucket.org/genomicepidemiology/resfinder_db/src/master),  
515 last update March 2021), were aligned with ClustalW. The phylogenetic tree was  
516 calculated by MEGA<sup>39</sup> (v10) using the maximum likelihood algorithm with default  
517 parameters. The Interactive Tree of Life (iTOL v6) online tool<sup>40</sup> was used to prepare  
518 the phylogenetic tree for display.

519

#### 520 **Protein model and docking**

521 Rosetta<sup>41</sup> was utilized to predict the protein structure using ab initio protein folding  
522 (<http://rosetta.bakerlab.org/>). The top five protein pockets were generated for docking  
523 calculation with Surface Topography of proteins<sup>42</sup> (CASTp). We used the Cambridge  
524 Structure Database<sup>43</sup> to generate streptomycin conformers. The 3D protein-ligand  
525 complexes were obtained from AutoDock Vina<sup>44</sup>.

526

#### 527 **ARG candidate gene expression plasmids construction and expression** 528 **verification**

529 The candidate resistance gene Candi\_60363\_1 and a positive control resistance gene  
530 AHE40557.1 were synthesized and subcloned into pUC19 vector, replacing *lacZ'*  
531 gene. The recombinant plasmids were then transformed into *E. coli* BL21 (DE3). The  
532 expression of resistance genes was induced by Isopropyl  $\beta$ -D-1-thiogalactopyranoside

533 (IPTG) and verified by quantitative Real-time PCR (qRT-PCR) assay. Briefly, bacteria  
534 were grown in LB supplemented with ampicillin (100 µg/ml) to OD600 of 0.5-0.6 by  
535 incubation at 37 °C with 220 rpm agitation, and the bacterial cultures were continued  
536 to grow until OD600 reached to 1.0 by adding or without adding 1 mM IPTG. The  
537 cells were harvested and total RNAs were purified using Bacterial RNA Extraction  
538 Kit (Vazyme Biotech). RNA reverse transcription was performed by using HiScript®  
539 II Q Select RT SuperMix for qPCR kit (Vazyme Biotech). qRT-PCR was performed  
540 by using SYBR Green Master Mix-High ROX Premixed (Vazyme Biotech) in a  
541 Stepone Plus system (Applied Biosystems). The *ldh* gene was used as internal control  
542 in all reactions. The relative fold changes were determined using the  $2^{-\Delta\Delta Ct}$  method, in  
543 which *ldh* was used for normalization. The protein sequences of the synthesized genes  
544 were presented in **Supplementary Table 8** and the primer sequences for qRT-PCR  
545 were listed in **Supplementary Table 9**.

546

#### 547 **MIC determination**

548 Minimal inhibitory concentrations (MICs) of the antibiotic for the strains containing  
549 resistance genes were determined using E-tests. Single colonies of the strains were  
550 incubated in 3 ml Mueller-Hinton (MH) medium with the addition of 100 µg/ml  
551 ampicillin at 35 °C for 4 hours, and the cells equal to  $1.5 \times 10^8$  cells/ml were spread on  
552 MH agar plates with the addition of 100 µg/ml ampicillin and 1 mM IPTG, and  
553 streptomycin MIC Test Strips (Liofilchem®) were put in the middle of the plates. The  
554 plates were incubated at 35 °C for 18-24 hours, and the MICs were read. The strain  
555 containing empty vector was used as a negative control.

556

#### 557 **Data availability**

558 We collected metagenomic samples from several published studies<sup>25,26</sup>, and these  
559 samples are mainly from “marine”, “soil” and “human” associated environments. For  
560 human associated samples, including two gut groups (one group from Madagascar,  
561 i.e., GutM, the other group from Denmark, i.e., GutD), one oral group and one skin

562 group (both oral and skin groups are from HMP project). Details and links about these  
563 samples are shown in **Supplementary Table 4**. The ONN4ARG-DB dataset could be  
564 accesses at: <http://onn4arg.xfcui.com/>.

565

### 566 **Code availability**

567 All source codes can be accessed at: <https://github.com/xfcui/onn4arg>, and  
568 <http://onn4arg.xfcui.com/>.

569

### 570 **Acknowledgments**

571 We are grateful to Mingyue Cheng and Hui Chong for insightful discussions. We  
572 thank LetPub ([www.letpub.com](http://www.letpub.com)) for its linguistic assistance during the preparation of  
573 this manuscript. This work was partially supported by National Science Foundation of  
574 China grant 81774008, 81573702, 31871334 and 31671374, and the Ministry of  
575 Science and Technology's national key research and development program grant (No.  
576 2018YFC0910502).

577

### 578 **Author contributions**

579 KN, XC conceived and proposed the idea, and designed the study. YZ, CC, QJ, XZ,  
580 XC performed the experiments and analyzed the data. YZ, CC, XZ, KN and XC  
581 contributed to editing and proof-reading the manuscript. All authors read and  
582 approved the final manuscript.

583

### 584 **Competing interests**

585 The authors declare that they have no competing interests.

586

### 587 **Ethics approval and consent to participate**

588 Not applicable

589

590

## 591 **References**

- 592 1 Thomas, A. M. & Segata, N. Multiple levels of the unknown in microbiome  
593 research. *bmc biology* **17**, doi:10.1186/S12915-019-0667-Z (2019).
- 594 2 Li, J. *et al.* An integrated catalog of reference genes in the human gut  
595 microbiome. *nature biotechnology* **32**, 834-841, doi:10.1038/NBT.2942  
596 (2014).
- 597 3 Brogan, D. M. & Mossialos, E. A critical analysis of the review on  
598 antimicrobial resistance report and the infectious disease financing facility.  
599 *globalization and health* **12**, 8-8, doi:10.1186/S12992-016-0147-Y (2016).
- 600 4 Goossens, H., Ferech, M., Stichele, R. V. & Elseviers, M. Outpatient antibiotic  
601 use in Europe and association with resistance: a cross-national database study.  
602 *the lancet* **365**, 579-587, doi:10.1016/S0140-6736(05)17907-0 (2005).
- 603 5 Jia, B. *et al.* CARD 2017: expansion and model-centric curation of the  
604 comprehensive antibiotic resistance database. *nucleic acids research* **45**,  
605 doi:10.1093/NAR/GKW1004 (2017).
- 606 6 Alcock, B. P. *et al.* CARD 2020: antibiotic resistome surveillance with the  
607 comprehensive antibiotic resistance database. *nucleic acids research* **48**,  
608 doi:10.1093/NAR/GKZ935 (2019).
- 609 7 Böhm, M.-E., Razavi, M., Marathe, N. P., Flach, C.-F. & Larsson, D. G. J.  
610 Discovery of a novel integron-borne aminoglycoside resistance gene present  
611 in clinical pathogens by screening environmental bacterial communities.  
612 *microbiome* **8**, 1-11, doi:10.1186/S40168-020-00814-Z (2020).
- 613 8 Bortolaia, V. *et al.* ResFinder 4.0 for predictions of phenotypes from  
614 genotypes. *journal of antimicrobial chemotherapy* **75**, 3491-3500,  
615 doi:10.1093/JAC/DKAA345 (2020).
- 616 9 Bateman, A. *et al.* UniProt: A hub for protein information. *nucleic acids*  
617 *research* **43**, doi:10.1093/NAR/GKU989 (2015).
- 618 10 Rowe, W. *et al.* Search Engine for Antimicrobial Resistance: A Cloud  
619 Compatible Pipeline and Web Interface for Rapidly Detecting Antimicrobial  
620 Resistance Genes Directly from Sequence Data. *plos one* **10**,  
621 doi:10.1371/JOURNAL.PONE.0133492 (2015).
- 622 11 Kleinheinz, K. A., Joensen, K. G. & Larsen, M. V. Applying the ResFinder and  
623 VirulenceFinder web-services for easy identification of acquired antibiotic  
624 resistance and E. coli virulence genes in bacteriophage and prophage  
625 nucleotide sequences. *Bacteriophage* **4**, e27943-e27943,  
626 doi:10.4161/bact.27943 (2014).
- 627 12 Arango-Argoty, G. *et al.* DeepARG: a deep learning approach for predicting  
628 antibiotic resistance genes from metagenomic data. *microbiome* **6**, 23-23,  
629 doi:10.1186/S40168-018-0401-Z (2018).
- 630 13 Davis, J. J. *et al.* Antimicrobial Resistance Prediction in PATRIC and RAST.  
631 *scientific reports* **6**, 27930-27930, doi:10.1038/SREP27930 (2016).
- 632 14 Lakin, S. M. *et al.* Hierarchical Hidden Markov models enable accurate and  
633 diverse detection of antimicrobial resistance sequences. *Commun Biol* **2**,

- 634 294-294, doi:10.1038/s42003-019-0545-9 (2019).
- 635 15 Doster, E. *et al.* MEGARes 2.0: a database for classification of antimicrobial  
636 drug, biocide and metal resistance determinants in metagenomic sequence data.  
637 *Nucleic acids research* **48**, D561-D569, doi:10.1093/nar/gkz1010 (2020).
- 638 16 Li, Y. *et al.* HMD-ARG: hierarchical multi-task deep learning for annotating  
639 antibiotic resistance genes. *microbiome* **9**, 40-40,  
640 doi:10.1186/S40168-021-01002-3 (2021).
- 641 17 Gupta, S. K. *et al.* ARG-ANNOT, a new bioinformatic tool to discover  
642 antibiotic resistance genes in bacterial genomes. *Antimicrobial agents and  
643 chemotherapy* **58**, 212-220, doi:10.1128/AAC.01310-13 (2014).
- 644 18 Feldgarden, M. *et al.* Validating the AMRFinder Tool and Resistance Gene  
645 Database by Using Antimicrobial Resistance Genotype-Phenotype  
646 Correlations in a Collection of Isolates. *Antimicrobial agents and  
647 chemotherapy* **63**, e00483-00419, doi:10.1128/AAC.00483-19 (2019).
- 648 19 Inouye, M. *et al.* SRST2: Rapid genomic surveillance for public health and  
649 hospital microbiology labs. *genome medicine* **6**, 90-90,  
650 doi:10.1186/S13073-014-0090-6 (2014).
- 651 20 Rowe, W. P. M. & Winn, M. D. Indexed variation graphs for efficient and  
652 accurate resistome profiling. *bioinformatics* **34**, 3601-3608,  
653 doi:10.1093/BIOINFORMATICS/BTY387 (2018).
- 654 21 Altschul, S. F., Gish, W., Miller, W. C., Myers, E. W. & Lipman, D. J. Basic  
655 Local Alignment Search Tool. *journal of molecular biology* **215**, 403-410,  
656 doi:10.1016/S0022-2836(05)80360-2 (1990).
- 657 22 Edgar, R. C. Search and clustering orders of magnitude faster than BLAST.  
658 *Bioinformatics* **26**, 2460-2461, doi:10.1093/bioinformatics/btq461 (2010).
- 659 23 Buchfink, B., Xie, C. & Huson, D. H. Fast and sensitive protein alignment  
660 using DIAMOND. *nature methods* **12**, 59-60, doi:10.1038/NMETH.3176  
661 (2015).
- 662 24 Steinegger, M. *et al.* HH-suite3 for fast remote homology detection and deep  
663 protein annotation. *bmc bioinformatics* **20**, 1-15,  
664 doi:10.1186/S12859-019-3019-7 (2019).
- 665 25 Sunagawa, S. *et al.* Structure and function of the global ocean microbiome.  
666 *science* **348**, 1261359-1261359, doi:10.1126/SCIENCE.1261359 (2015).
- 667 26 Mitchell, A. L. *et al.* EBI Metagenomics in 2017: enriching the analysis of  
668 microbial communities, from sequence reads to assemblies. *Nucleic acids  
669 research* **46**, D726-D735, doi:10.1093/nar/gkx967 (2018).
- 670 27 Hyatt, D. *et al.* Prodigal: prokaryotic gene recognition and translation  
671 initiation site identification. *bmc bioinformatics* **11**, 119-119,  
672 doi:10.1186/1471-2105-11-119 (2010).
- 673 28 Li, B. *et al.* Metagenomic and network analysis reveal wide distribution and  
674 co-occurrence of environmental antibiotic resistance genes. *ISME J* **9**,  
675 2490-2502, doi:10.1038/ismej.2015.59 (2015).
- 676 29 Wood, D. E., Lu, J. & Langmead, B. Improved metagenomic analysis with  
677 Kraken 2. *genome biology* **20**, 1-13, doi:10.1186/S13059-019-1891-0 (2019).



- 678 30 Qi, F. *et al.* Deciphering the late steps of rifamycin biosynthesis. *Nature*  
679 *Communications* **9**, 2342, doi:10.1038/s41467-018-04772-x (2018).
- 680 31 Floss, H. G. & Yu, T.-W. Rifamycin Mode of Action, Resistance, and  
681 Biosynthesis. *Chemical Reviews* **105**, 621-632, doi:10.1021/cr030112j (2005).
- 682 32 Yao, Y., Zhang, W., Jiao, R., Zhao, G. & Jiang, W. Efficient isolation of total  
683 RNA from antibiotic-producing bacterium *Amycolatopsis mediterranei*.  
684 *Journal of Microbiological Methods* **51**, 191-195,  
685 doi:doi.org/10.1016/S0167-7012(02)00078-7 (2002).
- 686 33 Wilson, M. C., Gulder, T. A. M., Mahmud, T. & Moore, B. S. Shared  
687 biosynthesis of the saliniketals and rifamycins in *Salinispora arenicola* is  
688 controlled by the sare1259-encoded cytochrome P450. *J Am Chem Soc* **132**,  
689 12757-12765, doi:10.1021/ja105891a (2010).
- 690 34 Saxena, A., Kumari, R., Mukherjee, U., Singh, P. & Lal, R. Draft Genome  
691 Sequence of the Rifamycin Producer *Amycolatopsis rifamycinica* DSM 46095.  
692 *Genome Announc* **2**, e00662-00614, doi:10.1128/genomeA.00662-14 (2014).
- 693 35 Huang, H. *et al.* *Micromonospora rifamycinica* sp. nov., a novel actinomycete  
694 from mangrove sediment. **58**, 17-20, doi:doi.org/10.1099/ijs.0.64484-0  
695 (2008).
- 696 36 Pinto-Alphandary, H., Mabilat, C. & Courvalin, P. Emergence of  
697 aminoglycoside resistance genes aadA and aadE in the genus *Campylobacter*.  
698 *antimicrobial agents and chemotherapy* **34**, 1294-1296,  
699 doi:10.1128/AAC.34.6.1294 (1990).
- 700 37 Holden, M. T. G. *et al.* Rapid evolution of virulence and drug resistance in the  
701 emerging zoonotic pathogen *Streptococcus suis*. *plos one* **4**,  
702 doi:10.1371/JOURNAL.PONE.0006072 (2009).
- 703 38 Ramirez, M. S., Nikolaidis, N. & Tolmasky, M. Rise and dissemination of  
704 aminoglycoside resistance: the aac(6')-Ib paradigm. *frontiers in microbiology*  
705 **4**, 121-121, doi:10.3389/FMICB.2013.00121 (2013).
- 706 39 Kumar, S., Stecher, G., Li, M., Knyaz, C. & Tamura, K. MEGA X: Molecular  
707 Evolutionary Genetics Analysis across Computing Platforms. *Mol Biol Evol*  
708 **35**, 1547-1549, doi:10.1093/molbev/msy096 (2018).
- 709 40 Letunic, I. & Bork, P. Interactive Tree Of Life (iTOL) v4: recent updates and  
710 new developments. *Nucleic Acids Research* **47**, W256-W259,  
711 doi:10.1093/nar/gkz239 (2019).
- 712 41 Rohl, C. A., Strauss, C. E. M., Misura, K. M. S. & Baker, D. Protein structure  
713 prediction using Rosetta. *methods in enzymology* **383**, 66-93,  
714 doi:10.1016/S0076-6879(04)83004-0 (2004).
- 715 42 Tian, W., Chen, C. & Liang, J. CASTp 3.0: Computed Atlas of Surface  
716 Topography of Proteins and Beyond. *biophysical journal* **114**,  
717 doi:10.1016/J.BPJ.2017.11.325 (2018).
- 718 43 Cole, J. C., Korb, O., McCabe, P., Read, M. G. & Taylor, R. Knowledge-Based  
719 Conformer Generation Using the Cambridge Structural Database. *journal of*  
720 *chemical information and modeling* **58**, 615-629,  
721 doi:10.1021/ACS.JCIM.7B00697 (2018).

722 44 Trott, O. & Olson, A. J. AutoDock Vina: improving the speed and accuracy of  
723 docking with a new scoring function, efficient optimization, and  
724 multithreading. *J Comput Chem* **31**, 455-461, doi:10.1002/jcc.21334 (2010).

725



726 **Figure 1**

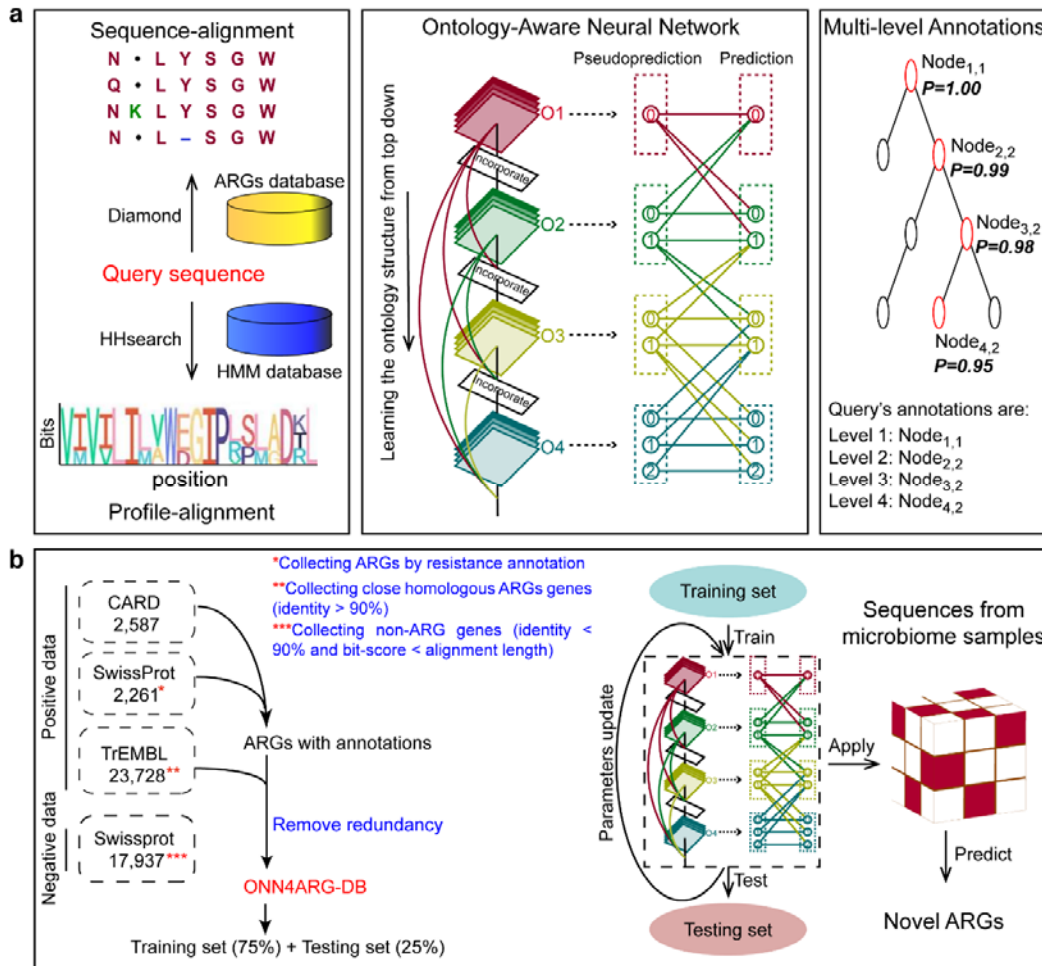

727

728 **Figure 1. Overview of the ONN4ARG model and its use for novel ARG discovery. a.** The

729 input (left), architecture (middle), and output (right) of the ONN4ARG model. ONN4ARG takes

730 similarities between the query gene sequence and ARG gene sequences and profiles as inputs.

731 Then, ontology-aware layers (i.e., O1, O2, O3, and O4) are employed to incorporate ancestor and

732 descendant annotations to enhance annotation accuracy. ONN4ARG outputs multi-level

733 annotations of antibiotic resistance types, which are compatible with the antibiotic resistance

734 ontology structure. **b.** Building the dataset for training and testing and applying it on microbiome

735 sequencing data to discover novel ARGs.

736

737 **Figure 2**

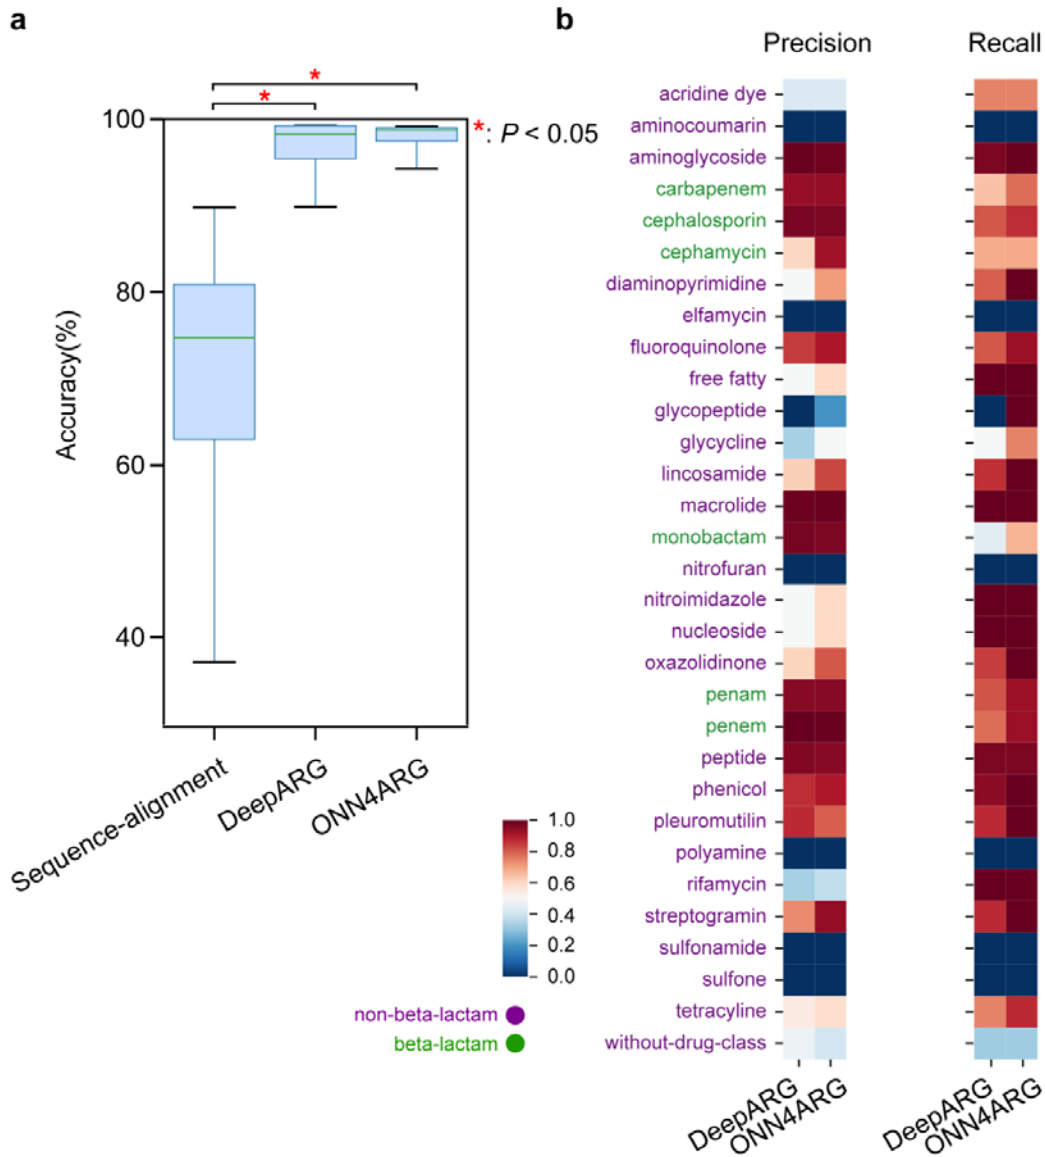

738

739 **Figure 2. Systematic evaluation and comparison between sequence-alignment, DeepARG,**

740 **and ONN4ARG. a.** The accuracy of three models on ARG classification was assessed using a box

741 plot. Diamond was used for sequence-alignment; significance test was based on the *t*-test. **b.** The

742 precision and recall of DeepARG and ONN4ARG on ARG classification for each antibiotic

743 resistance type. The masking threshold of testing set equaled 0.4 (details of masking threshold are

744 provided in **Methods**).

745

746 **Figure 3**

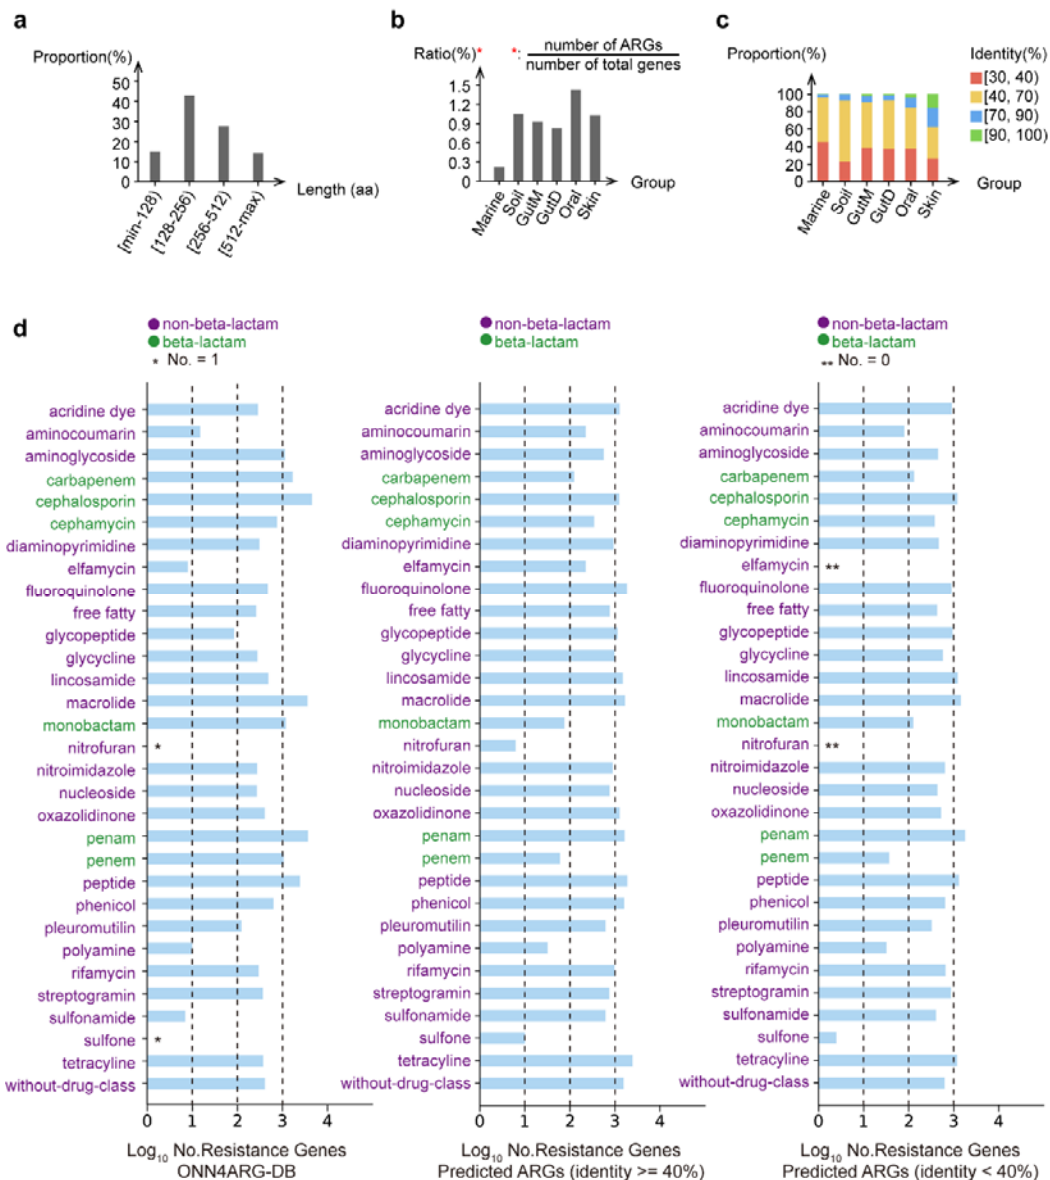

747

748 **Figure 3. Broad-spectrum profile of predicted ARGs among diverse environments. a.** The

749 proportion of predicted ARGs for different protein sequence lengths. **b.** The abundance ratio of

750 predicted ARGs among diverse environments. Abundance ratio was defined as the number of

751 ARGs divided by the number of total genes. **c.** The proportion of predicted ARGs for different

752 sequence identities among diverse environments. **d.** Number of genes in ONN4ARG-DB (left),

753 predicted homologous ARGs (middle), and predicted novel ARGs (right) for various resistance

754 types. The horizontal axis indicates the logarithmic number of genes, and the vertical axis

755 indicates different antibiotic resistance types. We collected metagenomic samples from several

756 published studies; these samples were mainly from “marine,” “soil,” and “human” environments.

757 Human-associated samples consisted of two gut groups (one group from Madagascar, i.e., GutM;

758 the other group from Denmark, i.e., GutD), one oral group, and one skin group (both oral and skin

759 groups were from the HMP project).

760

761 **Figure 4**

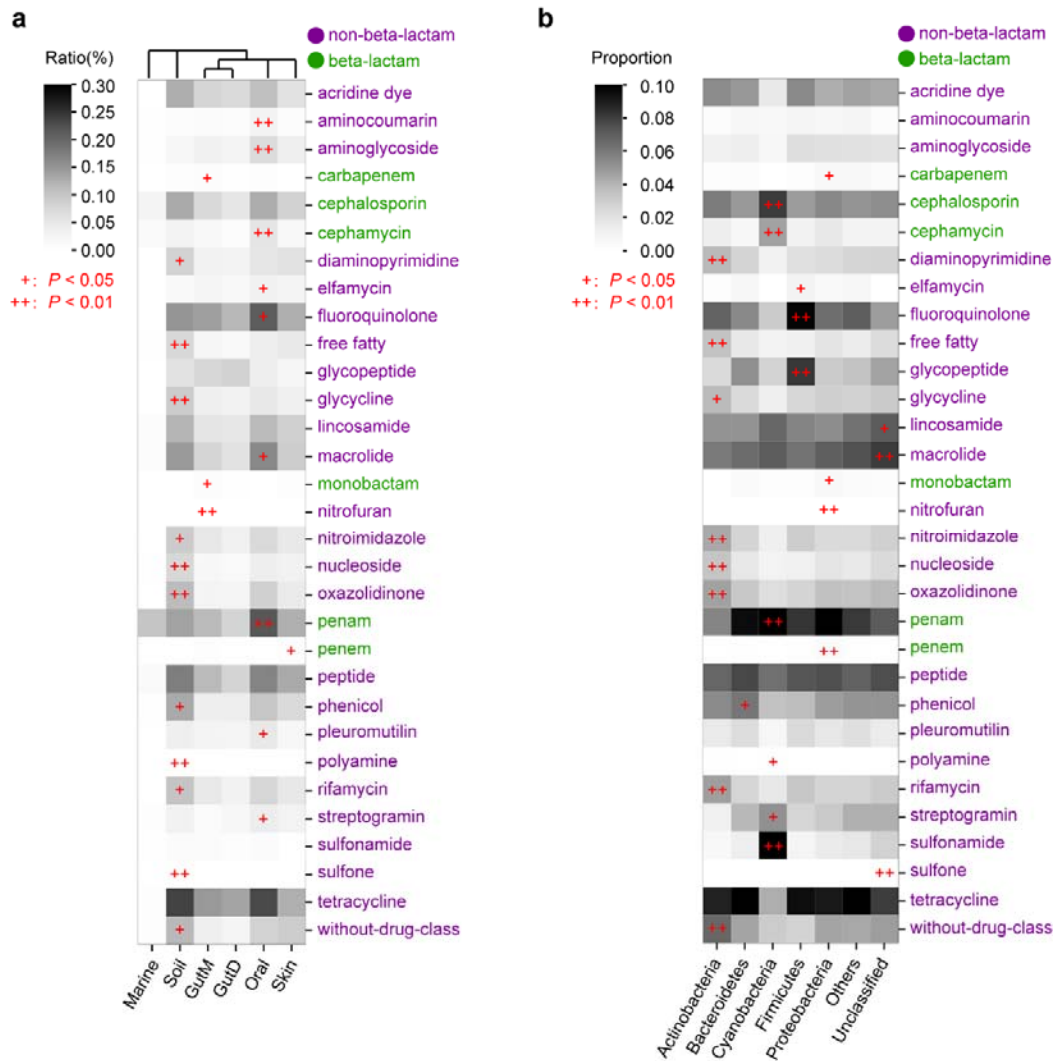

762

763 **Figure 4. Enrichment of predicted ARGs among diverse environments and hosts. a.** Relative

764 abundance and enrichment of ARGs among diverse environments. Abundance ratio was defined as

765 the number of ARGs divided by the number of total genes. **b.** Proportion and enrichment of ARGs

766 among diverse hosts. Colors indicate the proportion of ARGs for each phylum and resistance type.

767 Results for the most abundant five phyla that carry ARGs are shown. “+”: P-value < 0.05 (*t*-test);

768 “++”: P-value < 0.01 (*t*-test).

769

770 **Figure 5**

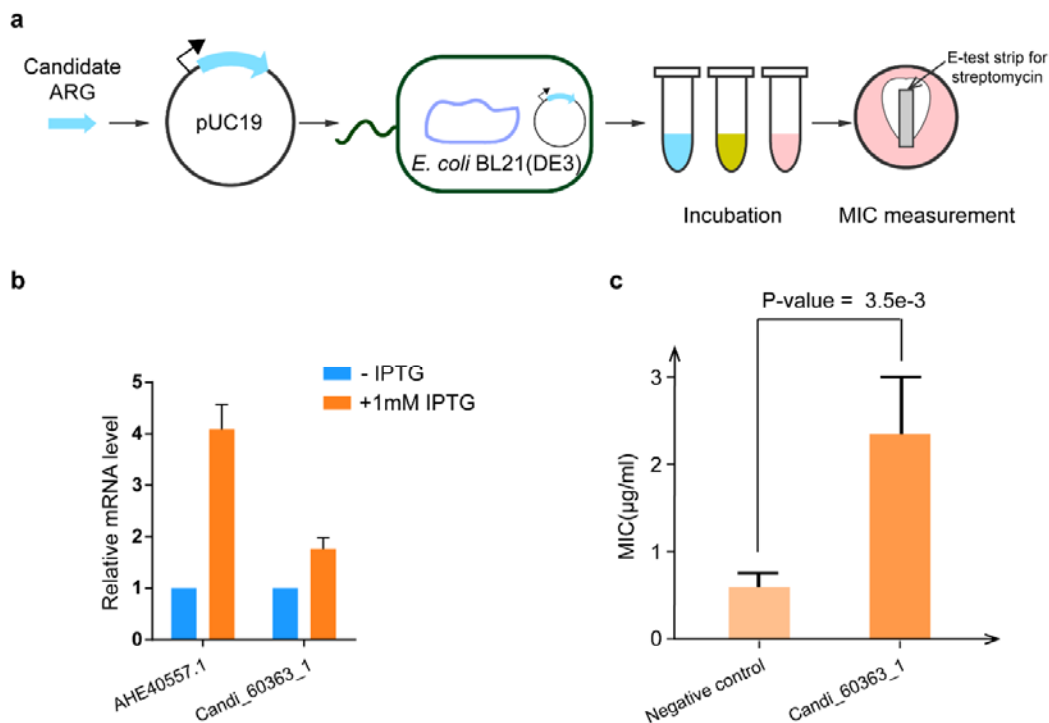

771

772 **Figure 5. Functional validation of a predicted candidate novel ARG.** **a.** A diagram showing  
773 the procedure of heterologous expression and functional analysis of the predicted candidate ARG  
774 in the *E. coli* BL21 (DE3) host. **b.** Gene expression validation of the predicted candidate ARG.  
775 The vertical axis indicates the relative mRNA level. **c.** The MIC of the predicted candidate ARG  
776 and negative control. The vertical axis indicates the MIC value. The MIC of the predicted  
777 candidate novel ARG is significantly higher than the negative control (*t*-test, P-value = 3.5e-3).

778

779 **Figure 6**

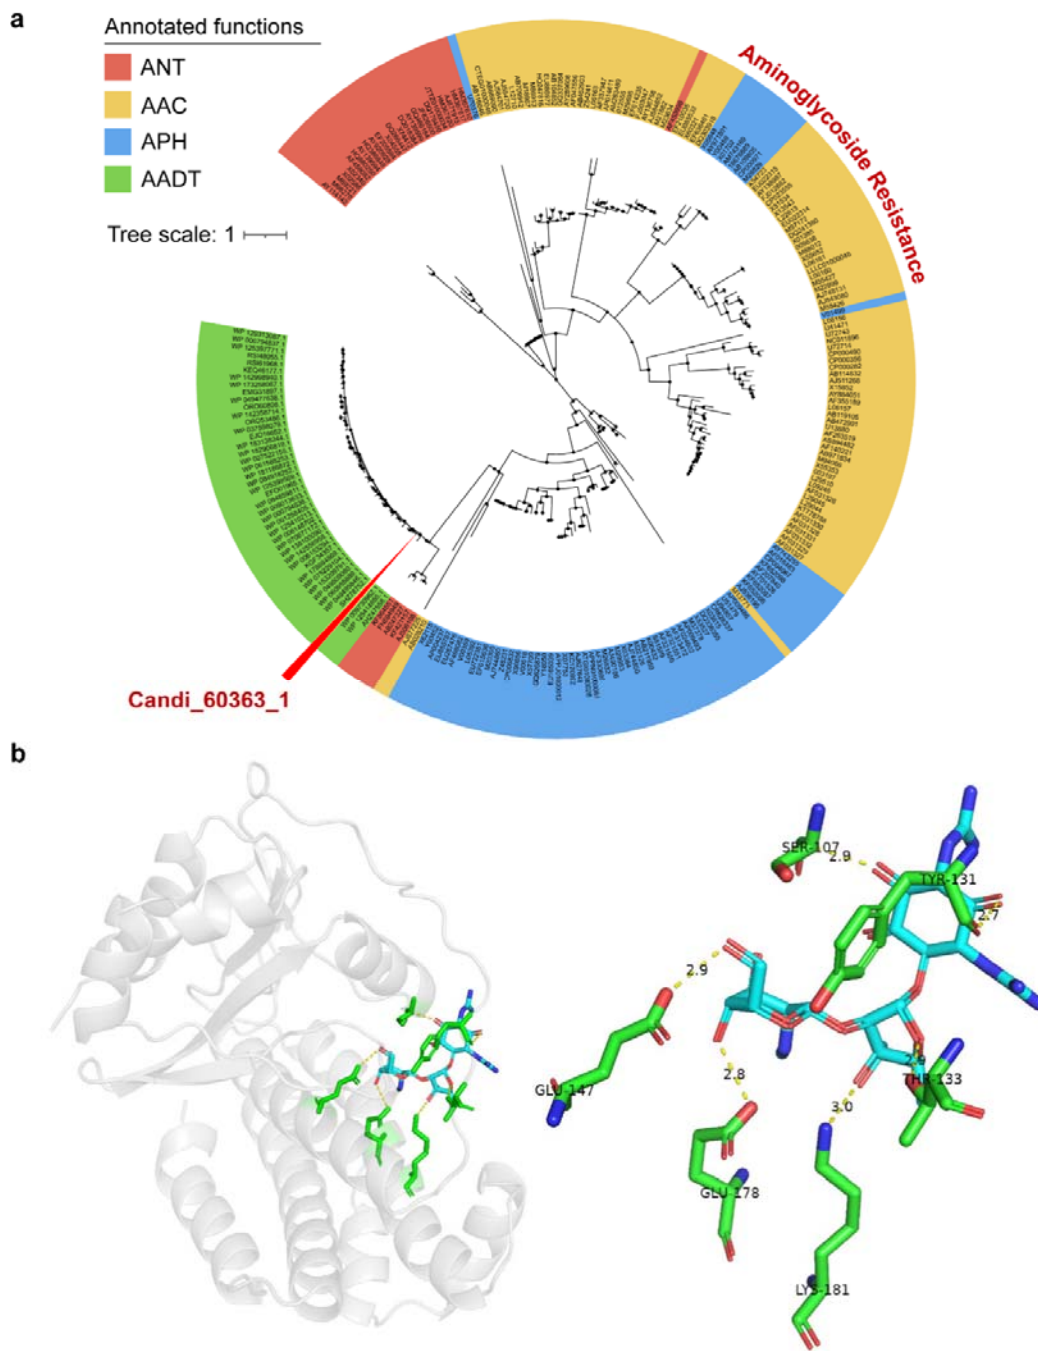

780

781 **Figure 6. Phylogenetic analysis and structure investigation of Candi\_60363\_1. a.**

782 Phylogenetic tree of aminoglycoside resistance enzymes, Candi\_60363\_1, and its homologs from

783 the NCBI non-redundant protein database. ANT: O-nucleotidyltransferase, AAC:

784 N-acetyltransferase, APH: O-phosphotransferase, AADT: aminoglycoside adenyltransferase. **b.**

785 The optimal Candi\_60363\_1-streptomycin complex structure (left), and the local interactions

786 between ligand and neighboring residues (right). The docking experiment indicates there are six

787 neighboring residues whose distances are less than three angstroms.

788



**a**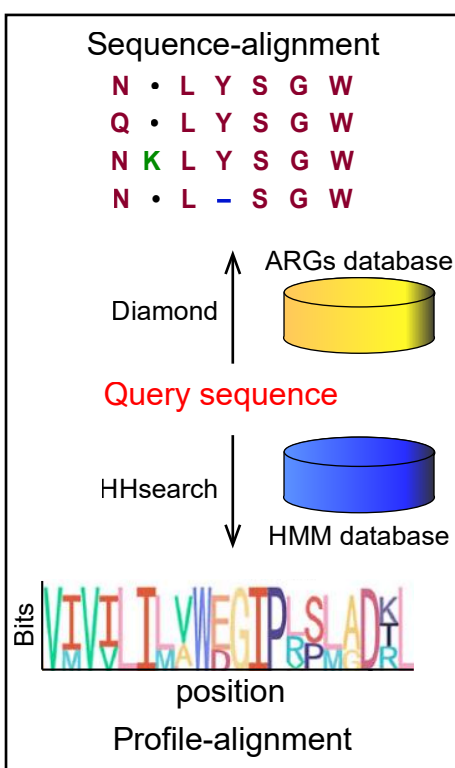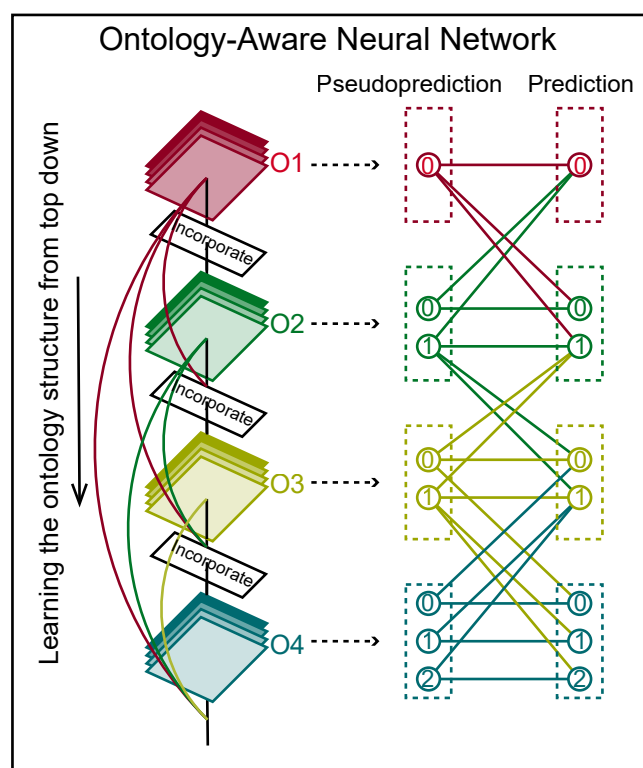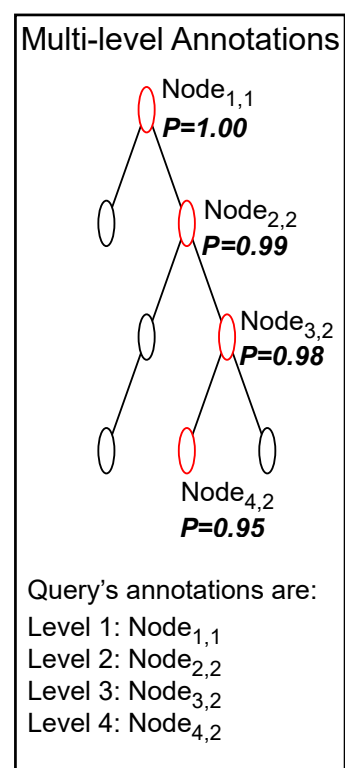**b**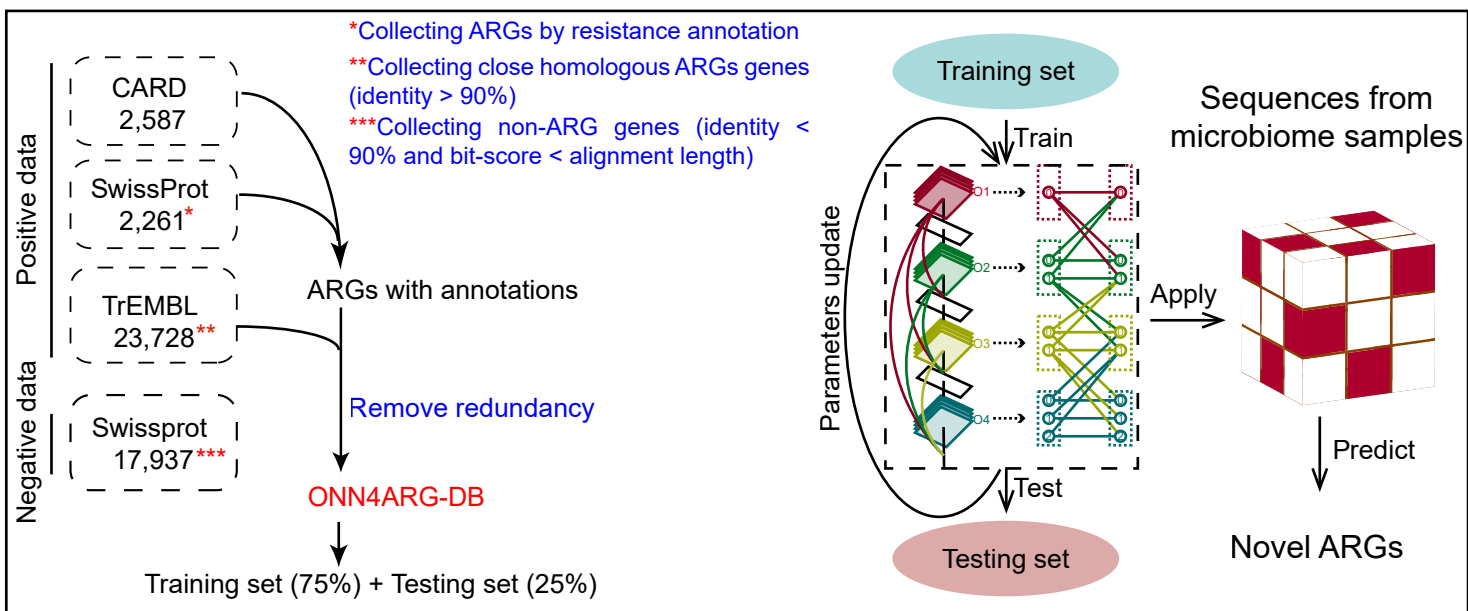

**a**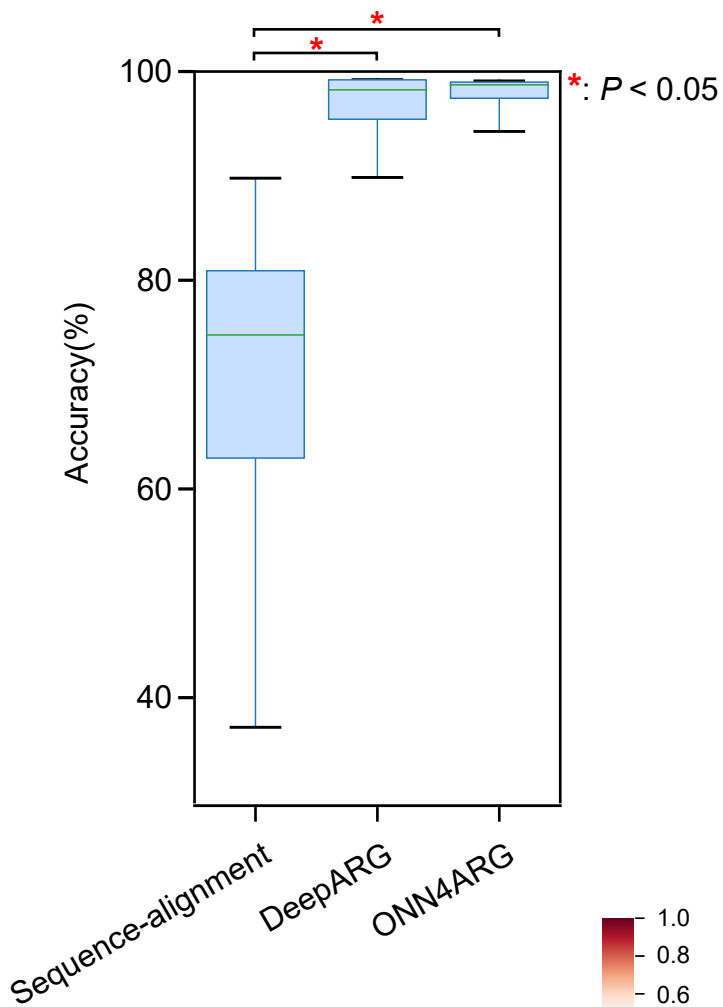

non-beta-lactam ●  
beta-lactam ●

**b**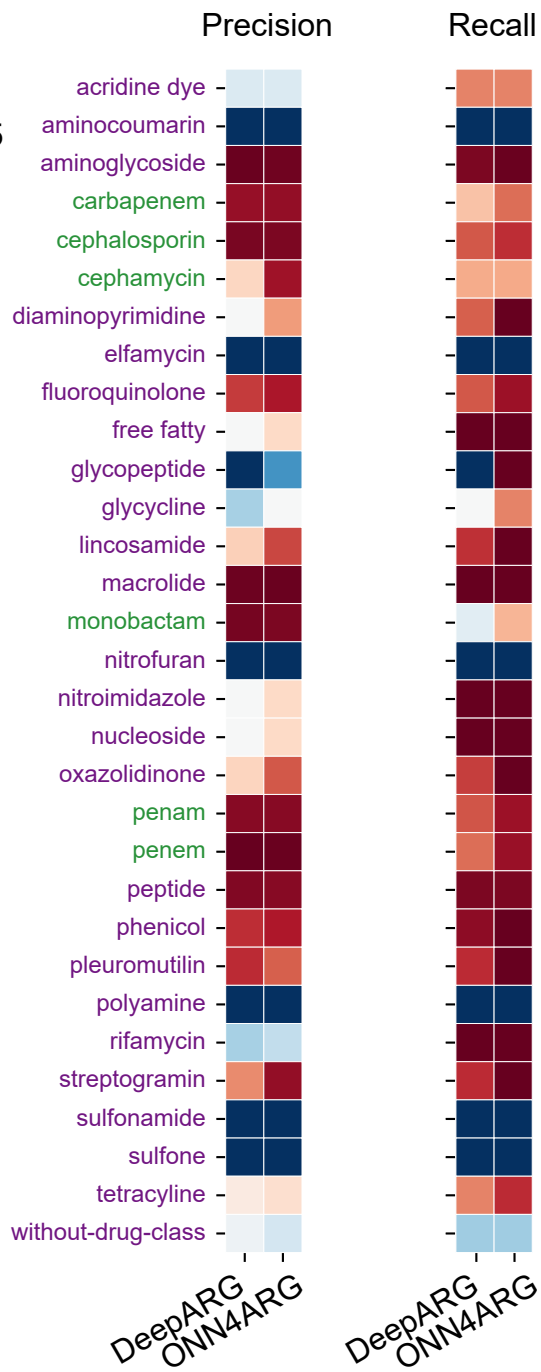

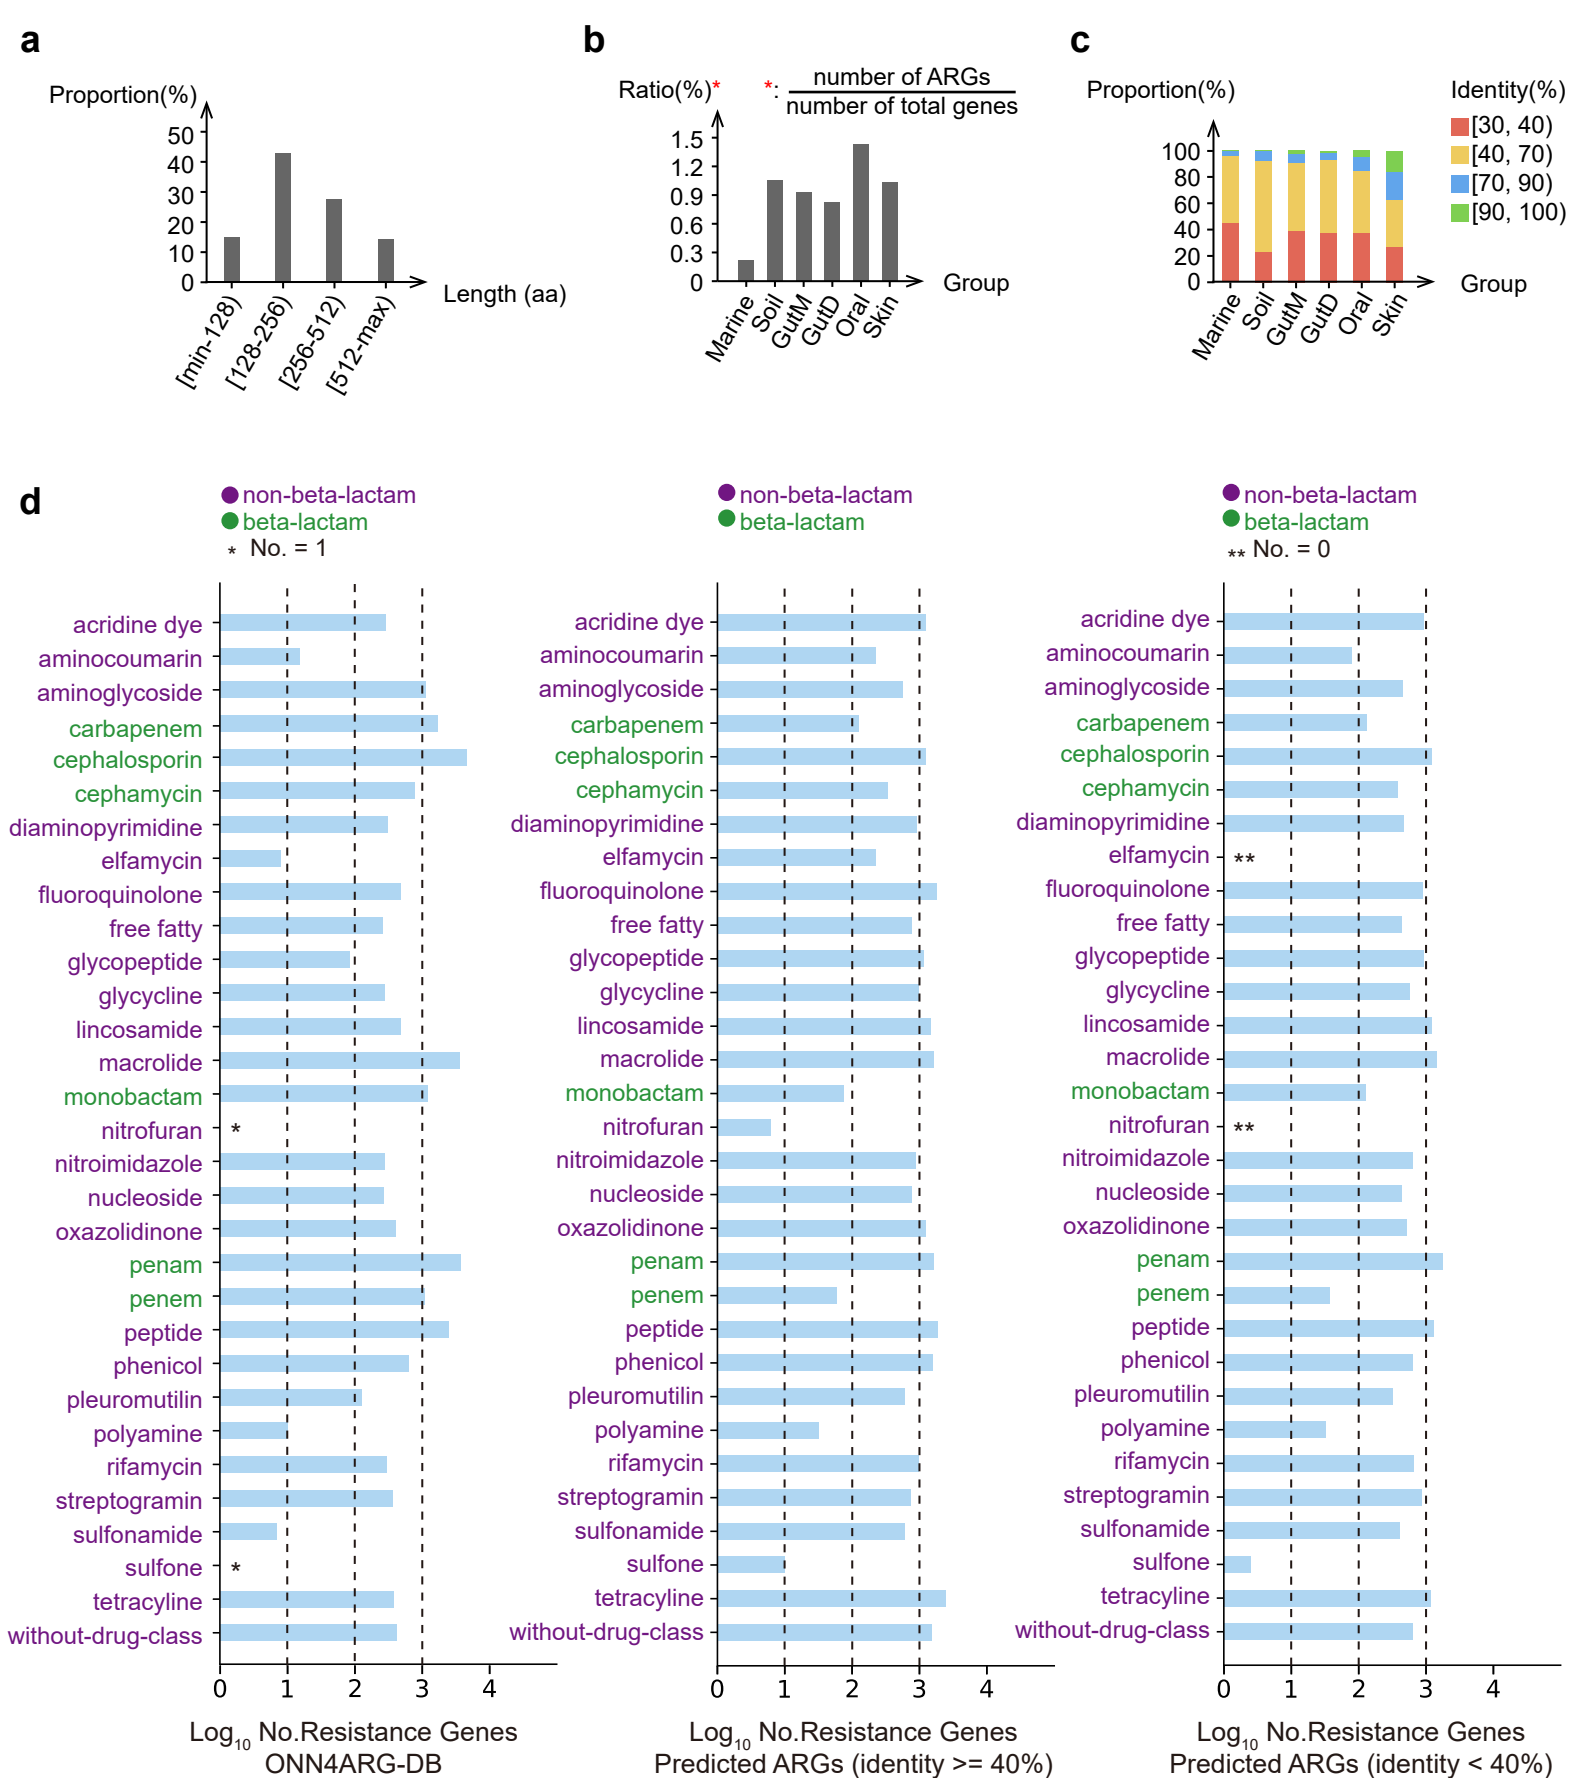

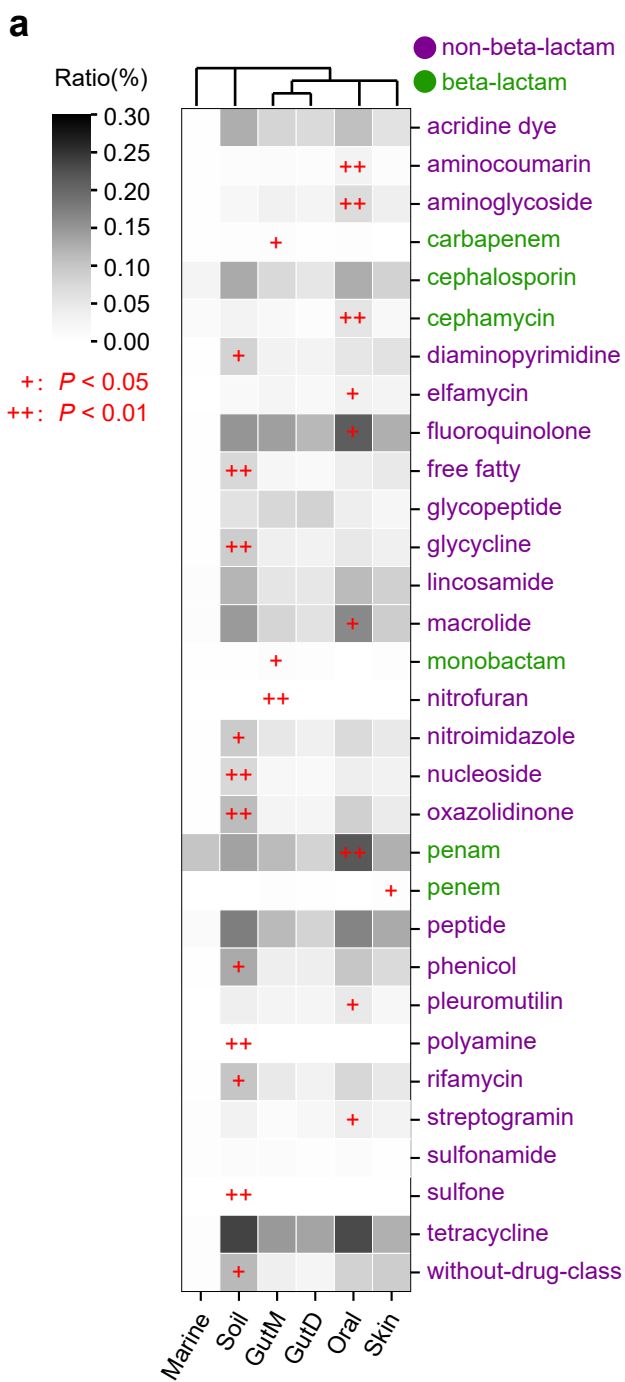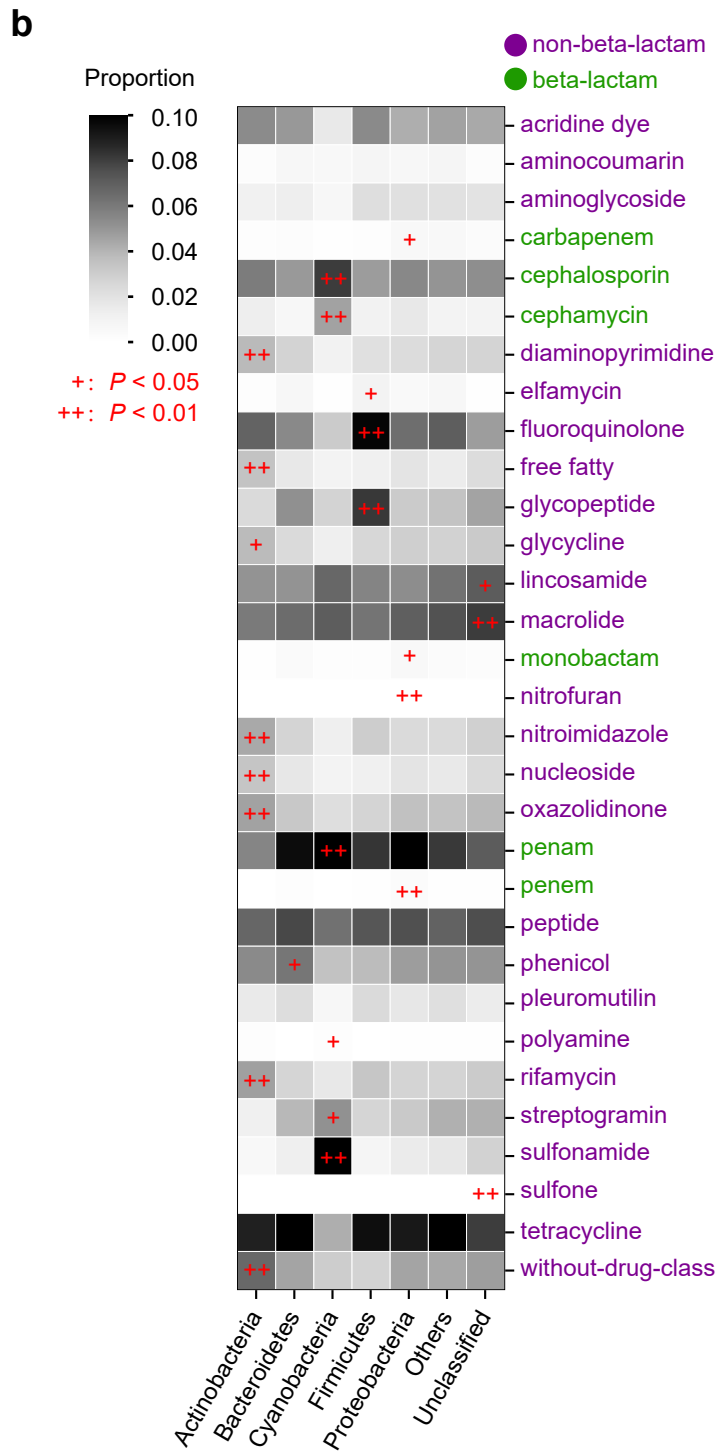

**a**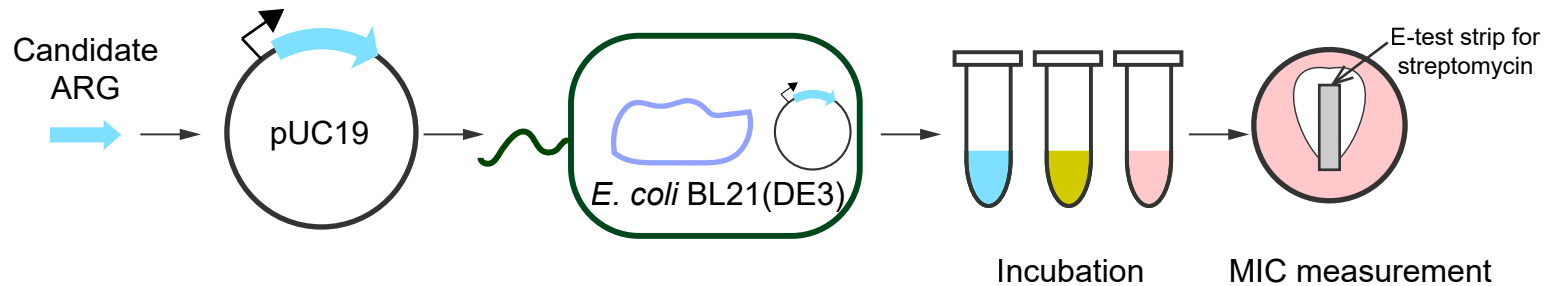**b**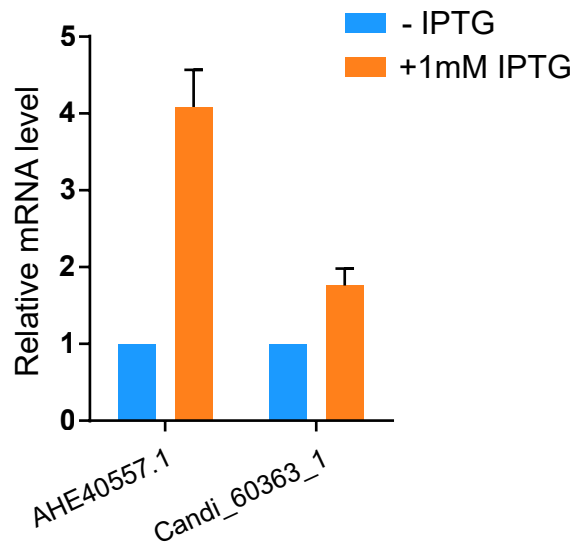**c**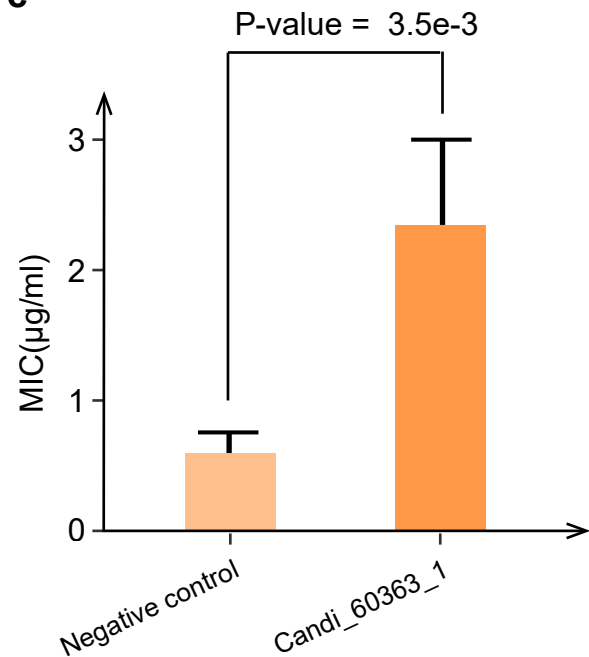

**a**

## Annotated functions

- ANT
- AAC
- APH
- AADT

Tree scale: 1

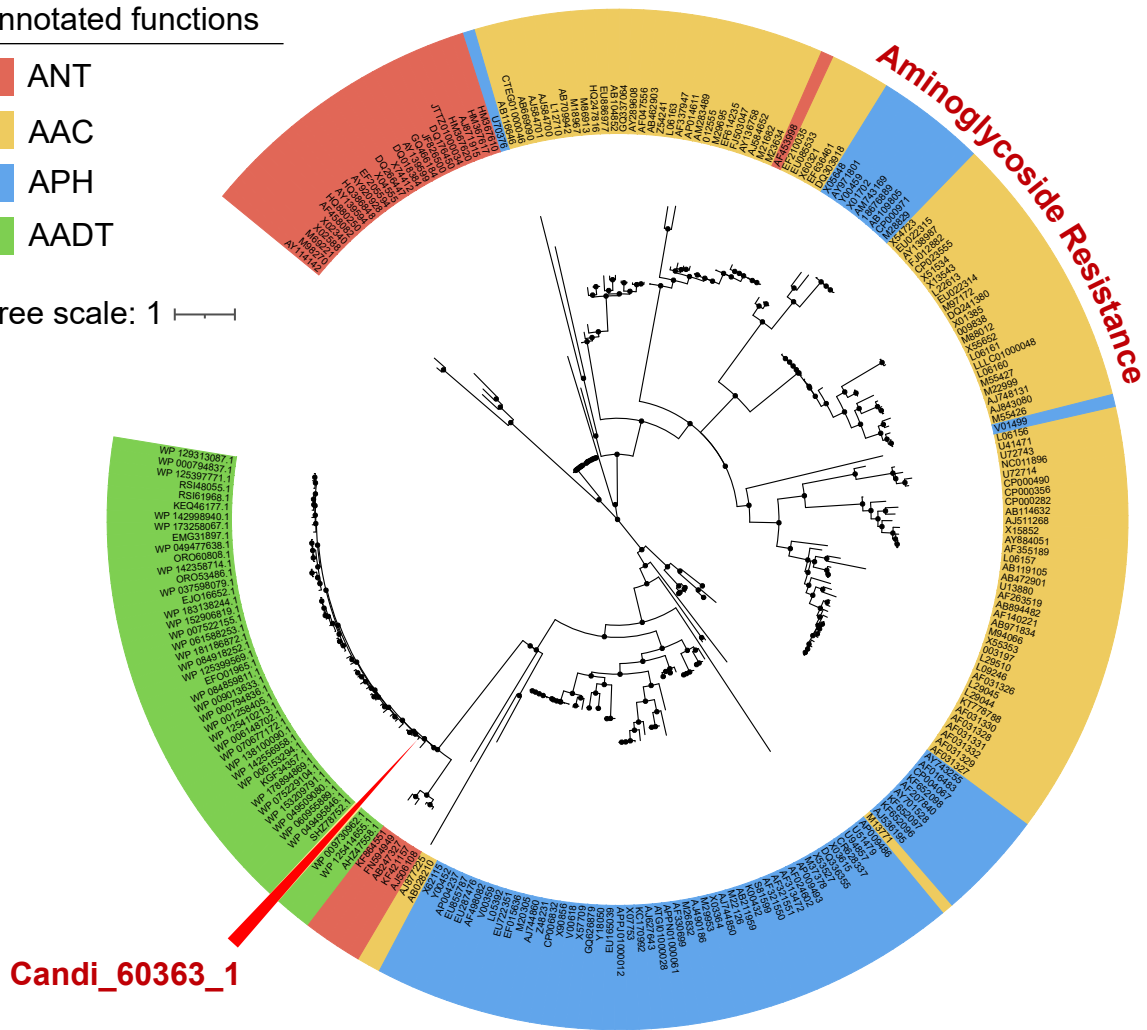**b**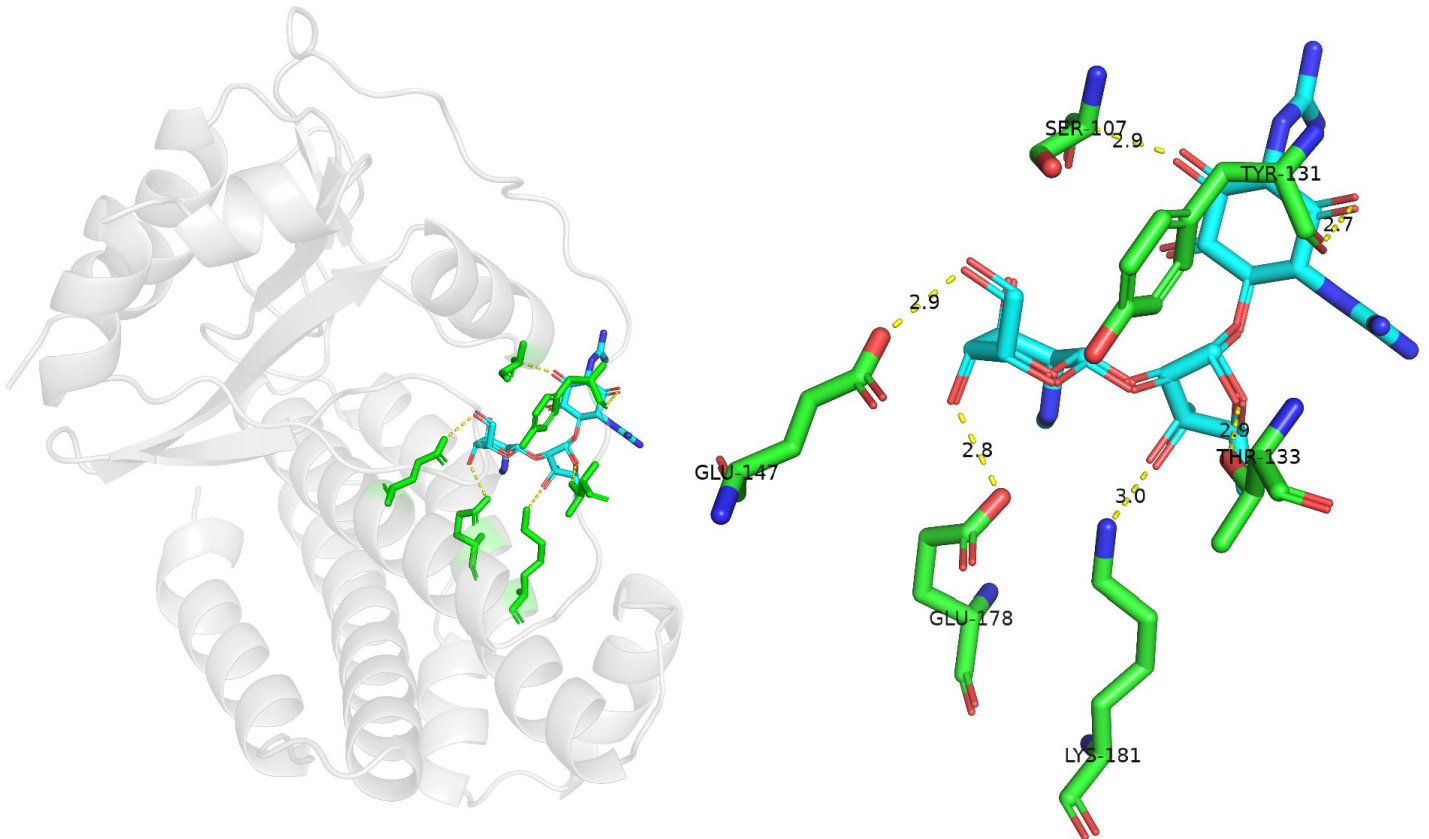

Source: http://biorxiv.org/content/10.1101/2021.07.30.454403v1.full.pdf
